# Supplementary material for: Autologous haematopoietic stem cell transplantation following high-dose chemotherapy for non-rhabdomyosarcoma soft tissue sarcomas: a Cochrane systematic review*
Source: PubMed Central journal article supplement — BMJ Open. 2014 Jul 29;4(7):e005033. doi: 10.1136/bmjopen-2014-005033 (PMC4120440; doi:10.1136/bmjopen-2014-005033), 2014-07-29
Supplement: bmjopen-2014-005033.draft_revisions.pdf [file bmjopen-2014-005033.draft_revisions.pdf]

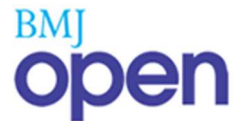

**Autologous haematopoietic stem cell transplantation  
following high-dose chemotherapy for non-  
rhabdomyosarcoma soft tissue sarcomas – a Cochrane  
Systematic Review**

|                                    |                                                                                                                                                                                                                                                                                         |
|------------------------------------|-----------------------------------------------------------------------------------------------------------------------------------------------------------------------------------------------------------------------------------------------------------------------------------------|
| Journal:                           | <i>BMJ Open</i>                                                                                                                                                                                                                                                                         |
| Manuscript ID:                     | bmjopen-2014-005033                                                                                                                                                                                                                                                                     |
| Article Type:                      | Research                                                                                                                                                                                                                                                                                |
| Date Submitted by the Author:      | 10-Feb-2014                                                                                                                                                                                                                                                                             |
| Complete List of Authors:          | Peinemann, Frank; University of Cologne, Children's Hospital<br>Labeit, Alexander; University of Illinois College of Medicine at Peoria,<br>Center for Outcomes Research<br>Smith, Lesley; Oxford Brookes University, Faculty of Health & Life<br>Sciences, Social Work & Public Health |
| <b>Primary Subject<br>Heading</b>: | Oncology                                                                                                                                                                                                                                                                                |
| Secondary Subject Heading:         | Haematology (incl blood transfusion), Pharmacology and therapeutics                                                                                                                                                                                                                     |
| Keywords:                          | Sarcoma < ONCOLOGY, CHEMOTHERAPY, Bone marrow transplantation <<br>HAEMATOLOGY                                                                                                                                                                                                          |
|                                    |                                                                                                                                                                                                                                                                                         |

SCHOLARONE™  
Manuscripts

1 *Subject: Autologous HSCT following HDCT for NRSTS*

2  
3 **Autologous haematopoietic stem cell transplantation following high-dose chemo-**  
4 **therapy for non-rhabdomyosarcoma soft tissue sarcomas – a Cochrane System-**  
5 **atic Review\***  
6  
7

8  
9 Frank Peinemann,<sup>1†</sup> Alexander M. Labeit,<sup>2</sup> Lesley A. Smith,<sup>3</sup>

10  
11 <sup>1</sup>Children's Hospital, University of Cologne, Cologne, Germany

12  
13 <sup>2</sup>Center for Outcomes Research, University of Illinois College of Medicine at Peoria, Illinois,  
14 USA

15  
16 <sup>3</sup>Department of Social Work & Public Health, Faculty of Health & Life Sciences, Oxford  
17 Brookes University, Oxford, UK

18  
19  
20  
21 \*This article is based on a Cochrane Systematic Review published in the Cochrane Database of  
22 Systematic Reviews (CDSR) 2013, Issue 8. Art. No.: CD008216. DOI:

23 10.1002/14651858.CD008216.pub4. (see [www.thecochranelibrary.com](http://www.thecochranelibrary.com) for information).

24  
25  
26  
27  
28  
29  
30  
31  
32  
33  
34  
35  
36  
37  
38  
39  
40  
41  
42  
43  
44  
45  
46  
47  
48  
49  
50  
51  
52  
53  
54  
55  
56  
57  
58  
59  
60  
Cochrane Systematic Reviews are regularly updated as new evidence emerges and in response to  
feedback, and the CDSR should be consulted for the most recent version of the review.

†Corresponding author: Frank Peinemann, M.D., M.Sc., Children's Hospital, University of  
Cologne, Kerpener Str. 62, 50937 Cologne, Germany. E-mail: [pubmedprjour-  
nal@gmail.com](mailto:pubmedprjournal@gmail.com). Phone: +49 (176) 31130745. Fax: +49 (221) 356851.

E-mail addresses:

FP: [pubmedprjournal@gmail.com](mailto:pubmedprjournal@gmail.com)

AL: [alabeit.publications@gmail.com](mailto:alabeit.publications@gmail.com)

LAS: [lesleysmith@brookes.ac.uk](mailto:lesleysmith@brookes.ac.uk)

1  
2  
3  
4  
5  
6  
7  
8  
9  
10  
11  
12  
13  
14  
15  
16  
17  
18  
19  
20  
21  
22  
23  
24  
25  
26  
27  
28  
29  
30  
31  
32  
33  
34  
35  
36  
37  
38  
39  
40  
41  
42  
43  
44  
45  
46  
47  
48  
49  
50  
51  
52  
53  
54  
55  
56  
57  
58  
59  
60

*Subject: Autologous HSCT following HDCT for NRSTS*

## Abstract

### Background

Non-rhabdomyosarcoma soft tissue sarcomas are a highly heterogeneous group of rare malignant solid tumors. In patients with locally advanced or metastatic disease, autologous haematopoietic stem cell transplantation following high-dose chemotherapy is a planned rescue therapy for its severe haematologic toxicity.

### Methods

The aim of this systematic review was to assess the effectiveness and safety of autologous haematopoietic stem cell transplantation following high-dose chemotherapy. We searched the electronic databases CENTRAL (The Cochrane Library 2010, Issue 2), MEDLINE and EMBASE (05 December 2012). We favoured the randomised design but included others. The primary outcomes were overall survival and treatment-related mortality.

### Results

We included 57 studies reporting on 175 transplanted patients. We identified one randomised controlled trial with a low risk of bias as the only comparative study. The overall survival at three years was 32.7% versus 49.4% with a hazard ratio of 1.26 (95% confidence interval 0.70 to 2.29, P value 0.44). Data on treatment-related mortality were sparse.

### Conclusion

Overall survival in patients with non-rhabdomyosarcoma soft tissue sarcomas was not statistically different after autologous haematopoietic stem cell transplantation following high-dose chemotherapy compared to standard-dose chemotherapy in patients.

1 *Subject: Autologous HSCT following HDCT for NRSTS*

2

3

4

5

6 **Keywords**

7

8

9 Systematic review, soft tissue sarcomas, high-dose chemotherapy, autologous haematopoietic

10 stem cell transplantation

11

12

13

14

15

16

17

18 **Strengths and limitations of this study**

19

20

- 21
- 22
- 23
- 24
- 25
- 26
- 27
- 28
- 29
- 30
- 31
- 32
- 33
- 34
- 35
- 36
- 37
- 38
- 39
- 40
- 41
- 42
- 43
- 44
- 45
- 46
- 47
- 48
- 49
- We conducted a comprehensive literature search and strictly adhered to the projected methodology.
  - The WHO classification of soft tissue sarcomas was adopted and modified to define a clear terminology for the study selection process.
  - We judged a low risk of bias for the single identified RCT, which may serve as the major relevant evidence.
  - Single-arm studies provided some estimation about serious adverse events with transplantation
  - Some treatments were performed 10 to 20 years ago. Thus, the results may not be applicable to patients who are treated today.
  - The included studies report various subtypes of non-rhabdomyosarcoma soft tissue sarcomas and each tumor type may carry an individual risk profile and, therefore, ideally should be evaluated separately.
- 50
- 51
- 52
- 53
- 54
- 55
- 56
- 57
- 58
- 59
- 60

1  
2  
3  
4  
5  
6  
7  
8  
9  
10  
11  
12  
13  
14  
15  
16  
17  
18  
19  
20  
21  
22  
23  
24  
25  
26  
27  
28  
29  
30  
31  
32  
33  
34  
35  
36  
37  
38  
39  
40  
41  
42  
43  
44  
45  
46  
47  
48  
49  
50  
51  
52  
53  
54  
55  
56  
57  
58  
59  
60

*Subject: Autologous HSCT following HDCT for NRSTS*

## Introduction

Soft tissue sarcomas (STS) are a highly heterogeneous group of rare malignant solid tumors of non-epithelial extraskelatal body tissue and are classified on a histogenetic basis[1]. The location of the primary tumor can involve any area of the body[2]. STS can involve any type of tissue and typically affect muscles, tendons, adipose tissue, blood vessels and joints and commonly present as a painless mass[3]. In this review we investigated non-rhabdomyosarcoma soft tissue sarcomas (NRSTS) provided that they are categorized as malignant according to the World Health Organization (WHO) 2002 classification[4]. In Western countries about four new cases of NRSTS are estimated per 100,000 population every year, with the Ewing family of tumors excluded from this statistic [5].

Surgery is the standard treatment for localized NRSTS and can be curative if distant dissemination is not present[6 7]. Chemotherapy is regarded mainly as a palliative treatment for high-risk patients who are characterized by inoperable, locally advanced and metastatic disease[6]. Riedel 2012 provides an overview of current systemic therapies and discusses possible novel therapeutic agents and treatment strategies[8]. High-dose chemotherapy (HDCT) has been evaluated as an alternative treatment option for high-risk patients. The rationale for HDCT is that escalating doses of HDCT may increase survival by capturing putatively remnant malignant cells[9]. The rationale for autologous haematopoietic stem cell transplantation (HSCT) following HDCT is a planned rescue for HDCT-related severe haematologic toxicity[9]. The primary objective of the present systematic review is to evaluate effectiveness and adverse events of HDCT followed by autologous HSCT in patients with NRSTS.

1 *Subject: Autologous HSCT following HDCT for NRSTS*

## 2 3 **Methods**

4  
5  
6 This article is based on a Cochrane Systematic Review published in The Cochrane Library[10].  
7  
8 Publication of this work is in agreement with the policy of The Cochrane Collaboration[11].  
9  
10 While preparing this systematic review, we endorsed the PRISMA statement, adhered to its prin-  
11  
12 ciples and conformed to its checklist[12].  
13

### 14 15 16 **Study inclusion criteria**

17  
18 We included patients with NRSTS provided that they are categorized as malignant according to  
19  
20 the World Health Organization (WHO) 2002 classification[4]. We excluded the Ewing family of  
21  
22 tumors (EFT) according to the European Society for Medical Oncology (ESMO) Guidelines  
23  
24 Working Group [5]. It is not fully clear whether the so-called 'unclassified' and the 'undifferenti-  
25  
26 ated' tumor types should be regarded as NRSTS. Therefore, we did not consider these tumor  
27  
28 types for the present review. Participants were included regardless of age, severity, and clinical  
29  
30 stage of disease. Studies were included as long as at least 80% of patients had NRSTS and re-  
31  
32 ceived the test intervention. The test intervention was HDCT followed by autologous HSCT con-  
33  
34 taining stem cells from peripheral blood or bone marrow. The comparator was standard-dose  
35  
36 chemotherapy. The primary outcomes were overall survival and treatment-related mortality.  
37  
38 Secondary outcomes were disease-free survival, progression-free survival, event-free survival,  
39  
40 non-haematological toxicity grades 3 to 4[13], secondary malignant neoplasia, and health-related  
41  
42 quality of life (HRQL).  
43  
44  
45  
46  
47

### 48 49 **Search strategy, selection of studies, and data extraction**

50  
51 We conducted an electronic literature database search in MEDLINE (Ovid), EMBASE (Ovid),  
52  
53 and Cochrane Library CENTRAL (Wiley) including articles published from inception to 05 De-  
54  
55 cember 2012. The corresponding search strategies are depicted in the original Cochrane Review.  
56  
57 We retrieved all titles and abstracts by electronic searching and downloaded them to the refer-  
58  
59  
60

1 *Subject: Autologous HSCT following HDCT for NRSTS*

2  
3  
4  
5  
6  
7  
8  
9  
10  
11  
12  
13  
14  
15  
16  
17  
18  
19  
20  
21  
22  
23  
24  
25  
26  
27  
28  
29  
30  
31  
32  
33  
34  
35  
36  
37  
38  
39  
40  
41  
42  
43  
44  
45  
46  
47  
48  
49  
50  
51  
52  
53  
54  
55  
56  
57  
58  
59  
60  
ence management database EndNote Version X3[14]. We considered studies written in languages other than English. We searched the online registries[15 16] on 5 December 2012 for additional completed or ongoing studies using the search strategy "sarcoma AND chemotherapy AND transplantation". We searched all retrieved abstracts of annual meetings contained in EMBASE (Ovid). We contacted authors to replenish missing information. All data assessments were performed independently by two independent review authors. We resolved differences by discussion or by appeal to a third review author.

### 20 **Assessment of risk of bias in included studies**

21  
22  
23  
24  
25  
26  
27  
28  
29  
30  
31  
32  
33  
34  
35  
36  
37  
38  
39  
40  
41  
42  
43  
44  
45  
46  
47  
48  
49  
50  
51  
52  
53  
54  
55  
56  
57  
58  
59  
60  
We have used four criteria from The Cochrane Collaboration's tool for assessing risk of bias in RCTs[17]: random sequence generation, allocation concealment, blinding of outcome assessment, and selective reporting such as not reporting pre-specified outcomes. We extended the Cochrane tool for assessing risk of bias by five criteria that consider nonrandomised studies: prospective design, comparable baseline characteristics, assignment of patients to treatment groups, concurrent control, and loss to follow up. We applied The Cochrane Collaboration's criteria for judging risk of bias[18].

### 38 **Data synthesis**

39  
40  
41  
42  
43  
44  
45  
46  
47  
48  
49  
50  
51  
52  
53  
54  
55  
56  
57  
58  
59  
60  
We synthesized aggregate data as narrative because data were too scarce to be pooled. In a sensitivity analysis, individual data from additional studies were pooled and available time-to-event data were analyzed in a Kaplan-Meier survival analysis by using the procedure *Lifetest* of the SAS computer program version 9.2[19]. We accepted time of diagnosis and beginning of treatment as starting points.

1 *Subject: Autologous HSCT following HDCT for NRSTS*

## 2 3 **Results**

### 4 5 **Search results**

6  
7 **Figure 1** shows the literature search and study flow. We retrieved 1035 records and evaluated  
8 260 fulltext papers in detail. We included 57 studies with 275 transplanted patients, one random-  
9 ised controlled trial (RCT)[20], six single-arm studies with aggregate cases data[21-26], and 50  
10 single-arm studies with individual data (references listed in the original Cochrane Review). We  
11 retrieved six ongoing but none of them had a comparative design.  
12  
13  
14  
15  
16  
17  
18  
19

### 20 **Baseline data**

21 **Table 1** gives an overview of the main characteristics of studies and patients. The one RCT was  
22 an open, multicenter, randomised phase III study with two parallel treatment groups[20]. Patients  
23 were eligible for randomisation if they had responded to chemotherapy or, for stable disease, if a  
24 complete surgical resection of all disease sites could be carried out. The intention-to-treat princi-  
25 ple was modified to exclude patients found to be ineligible at a histological review after random-  
26 isation. Three of the six single-arm studies with aggregate data collected the data  
27 prospectively[21-23] and three retrospectively[24-26]. Participants of the remaining 50 single-  
28 arm studies with available status on overall survival and length of follow up were considered in a  
29 survival analysis of pooled individual data.  
30  
31  
32  
33  
34  
35  
36  
37  
38  
39  
40  
41  
42

43 The 57 studies were set in 12 different countries in three different continents. Most of the trans-  
44 planted patients were studied in the United States and France. Patients had 15 different relevant  
45 histological diagnoses, most patients had desmoplastic small round-cell tumor. Median age var-  
46 ied roughly between 25 and 45 years and there was a substantial male preponderance.  
47  
48  
49  
50  
51  
52

### 53 **Primary outcome**

54 Overall survival was not statistically significantly different between HDCT followed by autolo-  
55 gous HSCT versus SDCT at three years reported in the RCT by Bui-Nguyen 2012[20] (**Table 2**).  
56  
57  
58  
59  
60



1 *Subject: Autologous HSCT following HDCT for NRSTS*

2  
3 With respect to the single-arm studies, overall survival for transplanted patients ranged roughly  
4  
5 from 20% to 51% and from 32% to 40% at three years (**Table 2**). The graphical presentation of  
6  
7 the Kaplan-Meier graph of individual survival data of 80 patients is shown in **Figure 2**. Treat-  
8  
9 ment-related mortality (TRM) was addressed in 12. A conservative estimate would be 5.5% con-  
10  
11 sidering a fraction of 15 procedure-related deaths of a total of 275 transplanted patients (**Table**  
12  
13 **3**).

### 14 15 16 17 **Secondary outcomes**

18  
19 Progression-free survival was also not statistically significantly different between HDCT fol-  
20  
21 lowed by autologous HSCT versus SDCT at three years reported in the RCT by Bui-Nguyen  
22  
23 2012[20]. The only comparative study did not report results on disease-free survival and event-  
24  
25 free survival. With respect to transplanted patients, a conservative estimate would be 13.8% (38  
26  
27 events of non-haematological toxicity grade 3 to 4 in a total of 275 transplanted patients) (**Table**  
28  
29 **3**). We identified one secondary neoplasia in one case report. Health-related quality of life scales  
30  
31 were not addressed in the included studies.  
32  
33  
34  
35

### 36 37 **Data quality**

38  
39 Clinical heterogeneity was substantial because tumor subdiagnosis varied considerable between  
40  
41 patients. Furthermore, tumor stage and metastasis was not reported for all participants. The RCT  
42  
43 by Bui-Nguyen 2012[20] stands out as it is the only study reporting comparative data. We  
44  
45 judged a low risk of bias for this trial for random sequence generation and selective reporting.  
46  
47 However, the trial does have some drawbacks. We judged an unclear risk for allocation con-  
48  
49 cealment because masking of allocation was not described in full detail. We judged a high risk of  
50  
51 bias for blinding of outcome assessment because it was not reported for any outcome. The other  
52  
53 56 of 57 studies are single-arm studies and therefore not qualified for assessing a treatment ef-  
54  
55 fect.  
56  
57  
58  
59  
60

1 *Subject: Autologous HSCT following HDCT for NRSTS*

## 2 3 **Discussion**

### 4 5 **Outcomes**

6  
7  
8 We identified one randomised controlled trial comparing HDCT followed by autologous HSCT  
9  
10 to standard chemotherapy (SDCT)[20]. The authors reported a difference in overall survival and  
11  
12 progression-free survival after the treatment in favour of SDCT but the difference was not statis-  
13  
14 tically significant, respectively. Therefore, there is evidence that patients may not have a better  
15  
16 survival after HDCT followed by autologous HSCT. If at all, this intervention should only be  
17  
18 offered after careful consideration and preferably only within a randomised controlled clinical  
19  
20 trial. We estimated a treatment-related mortality of 5.5%, which was somewhat higher than 2.0%  
21  
22 reported by others[27]. Severe toxicity grade 3 to 4 was sparsely reported in 9 studies. Studies on  
23  
24 health-related quality of life were not identified. The frequency of secondary neoplasia in 1 of  
25  
26 275 participants is probably an extreme underestimation of the true frequency due to a relatively  
27  
28 short follow up. The detection of secondary neoplasia depends on a long follow up and was es-  
29  
30 timated from 4.0% to 6.9% by others [28 29].  
31  
32  
33  
34  
35

### 36 **Strengths and limitations**

37  
38 The search strategy was broad and it is very likely that all relevant studies were identified. The  
39  
40 WHO classification of NRSTS was adopted and modified to define a clear terminology for the  
41  
42 study selection process. Studies were excluded if the proportion of non-eligible participants were  
43  
44 greater or equal to 20% of the total population. Authors were contacted to ask for additional data.  
45  
46 We judged a low risk of bias for the one identified RCT, which may serve as the major relevant  
47  
48 evidence. All other identified studies were single-arm studies that are not helpful to decide  
49  
50 whether autologous HSCT following HDCT for NRSTS is a meaningful treatment option. Nev-  
51  
52 ertheless, they provide some estimation about the serious adverse events with transplantation.  
53  
54 Some treatments were performed 10 to 20 years ago. Thus, the results may not be applicable to  
55  
56 patients who are treated today. Furthermore, the studies report various subtypes of NRSTS and  
57  
58  
59  
60

1 *Subject: Autologous HSCT following HDCT for NRSTS*

2  
3 each tumor type may carry an individual risk profile and, therefore, ideally should be evaluated  
4  
5 separately. With respect to the individual survival data, follow-up started at different time points,  
6  
7 that is, at diagnosis or at start of treatment. The delay between diagnosis and starting high-dose  
8  
9 chemotherapy can be considerable.  
10

### 11 **Other findings and opinions**

12  
13 We want to point out that some authors have warned against the use of HDCT followed by au-  
14  
15 tologous HSCT, indicating the possibility of repositioning of malignant cells[30]. Others have  
16  
17 questioned the use of HDCT with reference to the potential existence of refractory cancer stem  
18  
19 cells[9]. Pedrazzoli 2006 stated that the potential benefit of this treatment option has not been  
20  
21 investigated sufficiently in comparative studies [31]. Kasper 2005 concluded that the use of  
22  
23 HDCT for locally advanced or metastatic adult (soft tissue and bone) sarcomas still remains  
24  
25 highly investigational and should not be performed outside clinical trials[32]. The identified  
26  
27 RCT by Bui-Nguyen 2012 provides meaningful comparative data for the first time and its results  
28  
29 questions any benefit of the intervention. Finally, we cannot close the chapter as it can be unse-  
30  
31 cure to rely on a single trial.  
32  
33  
34  
35  
36  
37  
38  
39  
40  
41  
42  
43  
44  
45  
46  
47  
48  
49  
50  
51  
52  
53  
54  
55  
56  
57  
58  
59  
60

1 *Subject: Autologous HSCT following HDCT for NRSTS*

2  
3 **Conclusion**

4  
5  
6 The evidence base does not support the use of HDCT followed by autologous HSCT in high-risk  
7  
8 patients with NRSTS. It is doubtful whether further studies are necessary to clarify the relevance  
9  
10 of HDCT followed by autologous HSCT in patients with NRSTS. If this treatment is offered it  
11  
12 should only be after careful consideration and integrated within randomised, controlled trial.  
13  
14 Single-arm studies were helpful to increase the identification of reported adverse events. Criteria  
15  
16 for the included tumor types should adhere to the WHO classification.  
17  
18  
19  
20  
21  
22  
23  
24  
25  
26  
27  
28  
29  
30  
31  
32  
33  
34  
35  
36  
37  
38  
39  
40  
41  
42  
43  
44  
45  
46  
47  
48  
49  
50  
51  
52  
53  
54  
55  
56  
57  
58  
59  
60

1  
2  
3  
4  
5  
6  
7  
8  
9  
10  
11  
12  
13  
14  
15  
16  
17  
18  
19  
20  
21  
22  
23  
24  
25  
26  
27  
28  
29  
30  
31  
32  
33  
34  
35  
36  
37  
38  
39  
40  
41  
42  
43  
44  
45  
46  
47  
48  
49  
50  
51  
52  
53  
54  
55  
56  
57  
58  
59  
60

*Subject: Autologous HSCT following HDCT for NRSTS*

## Acknowledgments

We thank the Cochrane Gynaecological Cancer Review Group for their assistance during the preparation of the Cochrane Review. The National Institute for Health Research (NIHR) is the largest single funder of the Cochrane Gynaecological Cancer Group. The views and opinions expressed therein are those of the authors and do not necessarily reflect those of the NIHR, NHS or the Department of Health.

## Ethics statement

An ethics statement was not required for this work.

## Financial Disclosure

Provision of fulltexts by the University of Cologne, Germany. No funding bodies had any role in study design, data collection and analysis, decision to publish, or preparation of the manuscript.

## Competing Interests

No authors have any competing interests.

1 *Subject: Autologous HSCT following HDCT for NRSTS*

## 2 3 4 5 6 7 8 9 10 11 12 13 14 15 16 17 18 19 20 21 22 23 24 25 26 27 28 29 30 31 32 33 34 35 36 37 38 39 40 41 42 43 44 45 46 47 48 49 50 51 52 53 54 55 56 57 58 59 60

## References

1. Weiss SW, Goldblum JR. *Enzinger and Weiss's soft tissue tumors*. St. Louis: Mosby, 2001.
2. Clark MA, Fisher C, Judson I, et al. Soft-tissue sarcomas in adults. *N Engl J Med* 2005;**353**(7):701-11
3. Sondak VK, Chang AE. Clinical evaluation and treatment of soft tissue tumors. In: Weiss SW, Goldblum JR, eds. *Enzinger and Weiss's soft tissue tumors*. St. Louis: Mosby, 2001:21-44.
4. Fletcher CDM, Unni KK, Mertens F. *Pathology and genetics of tumours of soft tissue and bone*. Lyon: IARC Press, 2002.
5. ESMO / European Sarcoma Network Working Group. Soft tissue and visceral sarcomas: ESMO Clinical Practice Guidelines for diagnosis, treatment and follow-up. *Ann Oncol* 2012;**23**(Suppl 7):vii92-0
6. Casali PG, Blay JY. Soft tissue sarcomas: ESMO Clinical Recommendations for diagnosis, treatment and follow-up. *Ann Oncol* 2010;**21**(Suppl 5):v198–v203
7. Kotilingam D, Lev DC, Lazar AJ, et al. Staging soft tissue sarcoma: evolution and change. *CA Cancer J Clin* 2006;**56**(5):282-91
8. Riedel RF. Systemic therapy for advanced soft tissue sarcomas: highlighting novel therapies and treatment approaches. *Cancer* 2012;**118**(6):1474-85 doi: 10.1002/cncr.26415[published Online First: Epub Date]].
9. Banna GL, Simonelli M, Santoro A. High-dose chemotherapy followed by autologous hematopoietic stem-cell transplantation for the treatment of solid tumors in adults: a critical review. *Curr Stem Cell Res Ther* 2007;**2**(1):65-82
10. Peinemann F, Smith LA, Bartel C. Autologous hematopoietic stem cell transplantation following high dose chemotherapy for non-rhabdomyosarcoma soft tissue sarcomas. *Cochrane Database Syst Rev* 2013;**8**:CD008216 doi: 10.1002/14651858.CD008216.pub4[published Online First: Epub Date]].
11. Cochrane. The Cochrane Policy Manual [updated 14 April 2011]. Oxford: The Cochrane Collaboration, 2011.
12. Moher D, Liberati A, Tetzlaff J, et al. Preferred reporting items for systematic reviews and meta-analyses: the PRISMA statement. *PLoS Med* 2009;**6**:e1000097-e97
13. NCI. Common Terminology Criteria for Adverse Events (CTCAE) and Common Toxicity Criteria (CTC). Secondary Common Terminology Criteria for Adverse Events (CTCAE) and Common Toxicity Criteria (CTC) 2009. [http://ctep.cancer.gov/protocolDevelopment/electronic\\_applications/ctc.htm](http://ctep.cancer.gov/protocolDevelopment/electronic_applications/ctc.htm).
14. EndNote [program]. New York City: Thomson Reuters, 2013.

1 *Subject: Autologous HSCT following HDCT for NRSTS*

- 2  
3 15. National Library of Medicine (NLM). *ClinicalTrials.gov*. Bethesda: National Institutes of  
4 Health (NIH), 2013.
- 5  
6 16. International Clinical Trials Registry Platform (ICTRP). *ICTRP Search Platform*. Geneva:  
7 WHO World Health Organization, 2013.
- 8  
9 17. Higgins JPT, Altman DG, Sterne JAC. Table 8.5.a The Cochrane Collaboration's tool for  
10 assessing risk of bias. Chapter 8: Assessing risk of bias in included studies. In: Higgins  
11 JPT GS, ed. *Cochrane Handbook for Systematic Reviews of Interventions Version 510*  
12 [updated March 2011] The Cochrane Collaboration, 2011 Available from [www.cochrane-](http://www.cochrane-handbook.org)  
13 [handbookorg](http://www.cochrane-handbook.org). Chichester: John Wiley & Sons, Ltd, 2011.
- 14  
15  
16 18. Higgins JPT, Altman DG, Sterne JAC. Table 8.5.d Criteria for judging risk of bias in the  
17 'Risk of bias' assessment tool. Chapter 8: Assessing risk of bias in included studies. In:  
18 Higgins JPT GS, ed. *Cochrane Handbook for Systematic Reviews of Interventions*  
19 Version 510 [updated March 2011] The Cochrane Collaboration Available from  
20 [www.cochrane-handbook.org](http://www.cochrane-handbook.org). Chichester: John Wiley & Sons, Ltd, 2011.
- 21  
22  
23 19. program]. Cary: SAS Institute Inc., 2013.
- 24  
25 20. Bui-Nguyen B, Ray-Coquard I, Chevreau C, et al. High-dose chemotherapy consolidation for  
26 chemosensitive advanced soft tissue sarcoma patients: an open-label, randomized  
27 controlled trial. *Ann Oncol* 2012;**23**(3):777-84 doi: 10.1093/annonc/mdr282[published  
28 Online First: Epub Date]].
- 29  
30 21. Bertuzzi A, Castagna L, Quagliuolo V, et al. Prospective study of high-dose chemotherapy  
31 and autologous peripheral stem cell transplantation in adult patients with advanced  
32 desmoplastic small round-cell tumour. *Br J Cancer* 2003;**89**(7):1159-61
- 33  
34 22. Bisogno G, Ferrari A, Rosolen A, et al. Sequential intensified chemotherapy with stem cell  
35 rescue for children and adolescents with desmoplastic small round-cell tumor. *Bone*  
36 *Marrow Transplantation* 2010;**45**(5):907-11
- 37  
38 23. Blay JY, Bouhour D, Ray-Coquard I, et al. High-dose chemotherapy with autologous  
39 hematopoietic stem-cell transplantation for advanced soft tissue sarcoma in adults.  
40 *Journal of Clinical Oncology* 2000;**18**(21):3643-50
- 41  
42 24. Bokemeyer C, Franzke A, Hartmann JT, et al. A phase I/II study of sequential, dose-  
43 escalated, high dose ifosfamide plus doxorubicin with peripheral blood stem cell support  
44 for the treatment of patients with advanced soft tissue sarcomas. *Cancer*  
45 1997/10/1;**80**(7):1221-27
- 46  
47 25. Cook RJ, Wang Z, Arora M, et al. Clinical outcomes of patients with desmoplastic small  
48 round cell tumor of the peritoneum undergoing autologous HCT: a CIBMTR  
49 retrospective analysis. *Bone Marrow Transplant* 2012;**47**(11):1455-8 doi:  
50 10.1038/bmt.2012.57[published Online First: Epub Date]].
- 51  
52  
53 26. Philippe-Chomette P, Kabbara N, Andre N, et al. Desmoplastic small round cell tumors with  
54 EWS-WT1 fusion transcript in children and young adults. *Pediatr Blood Cancer*  
55 2012;**58**(6):891-7 doi: 10.1002/pbc.23403[published Online First: Epub Date]].
- 56  
57  
58  
59  
60

1 *Subject: Autologous HSCT following HDCT for NRSTS*

- 2
- 3 27. Rosti G, Ferrante P, Ledermann J, et al. High-dose chemotherapy for solid tumors: results of  
4 the EBMT. *Crit Rev Oncol Hematol* 2002;**41**(2):129-40
- 5
- 6 28. Neglia JP, Friedman DL, Yasui Y, et al. Second malignant neoplasms in five-year survivors  
7 of childhood cancer: childhood cancer survivor study. *J Natl Cancer Inst* 2001;**93**(8):618-  
8 29
- 9
- 10 29. Baker KS, DeFor TE, Burns LJ, et al. New malignancies after blood or marrow stem-cell  
11 transplantation in children and adults: incidence and risk factors. *Journal of Clinical*  
12 *Oncology* 2003;**21**(7):1352-58
- 13
- 14 30. Woods WG. Myeloablative therapy followed by stem cell rescue for pediatric solid tumors: a  
15 non-transplanter's perspective. *Cancer Research Therapy and Control* 1999;**9**(1-2):95-99
- 16
- 17 31. Pedrazzoli P, Ledermann JA, Lotz JP, et al. High dose chemotherapy with autologous  
18 hematopoietic stem cell support for solid tumors other than breast cancer in adults. *Ann*  
19 *Oncol* 2006;**17**(10):1479-88
- 20
- 21 32. Kasper B, Ho AD, Egerer G. Is there an indication for high-dose chemotherapy in the  
22 treatment of bone and soft-tissue sarcoma? *Oncology* 2005;**68**(2-3):115-21
- 23
- 24 33. Doros L, Kaste SC, Rodriguez-Galindo C. Sister Mary Joseph's nodule as presenting sign of  
25 a desmoplastic small round cell tumor. *Pediatric Blood and Cancer* 2008(2):388-90
- 26
- 27 34. Engelhardt M, Zeiser R, Ihorst G, et al. High-dose chemotherapy and autologous peripheral  
28 blood stem cell transplantation in adult patients with high-risk or advanced Ewing and  
29 soft tissue sarcoma. *J Cancer Res Clin Oncol* 2007/1;**133**(1):1-11
- 30
- 31 35. Kasper B, Dietrich S, Mechttersheimer G, et al. Large institutional experience with dose-  
32 intensive chemotherapy and stem cell support in the management of sarcoma patients.  
33 *Oncology* 2007;**73**(1-2):58-64
- 34
- 35 36. Navid F, Santana VM, Billups CA, et al. Concomitant administration of vincristine,  
36 doxorubicin, cyclophosphamide, ifosfamide, and etoposide for high-risk sarcomas.  
37 *Cancer* 2006;**106**(8):1846-56
- 38
- 39 37. Saab R, Khoury JD, Krasin M, et al. Desmoplastic small round cell tumor in childhood: the  
40 St. Jude Children's Research Hospital experience. *Pediatr Blood Cancer* 2007(3):274-79
- 41
- 42 38. Slease RB, Benear JB, Selby GB, et al. High-dose combination alkylating agent therapy with  
43 autologous bone marrow rescue for refractory solid tumors. *J Clin Oncol* 1988;**6**(8):1314-  
44 20
- 45
- 46 39. Yamamura R, Yamane T, Aoyama Y, et al. Development of chronic myelocytic leukemia  
47 after chemotherapy for malignant fibrous histiocytoma. *Acta Haematol* 2003;**109**(3):141-  
48 44
- 49
- 50 40. Garrido SM, Chauncey TR. Neuroleptic malignant syndrome following autologous  
51 peripheral blood stem cell transplantation. *Bone Marrow Transplant* 1998;**21**(4):427-28
- 52
- 53
- 54
- 55
- 56
- 57
- 58
- 59
- 60



1  
2  
3  
4  
5  
6  
7  
8  
9  
10  
11  
12  
13  
14  
15  
16  
17  
18  
19  
20  
21  
22  
23  
24  
25  
26  
27  
28  
29  
30  
31  
32  
33  
34  
35  
36  
37  
38  
39  
40  
41  
42  
43  
44  
45  
46  
47  
48  
49  
50  
51  
52  
53  
54  
55  
56  
57  
58  
59  
60

*Subject: Autologous HSCT following HDCT for NRSTS*

41. Kozuka T, Kiura K, Katayama H, et al. Tandem high-dose chemotherapy supported by autologous peripheral blood stem cell transplantation for recurrent soft tissue sarcoma. *Anticancer Res* 2002;**22**(5):2939-44
42. Kushner BH, Cheung NK, Kramer K, et al. Topotecan combined with myeloablative doses of thiotepa and carboplatin for neuroblastoma, brain tumors, and other poor-risk solid tumors in children and young adults. *Bone Marrow Transplant* 2001;**28**(6):551-56
43. Patel SR, Papadopolous N, Raymond AK, et al. A phase II study of cisplatin, doxorubicin, and ifosfamide with peripheral blood stem cell support in patients with skeletal osteosarcoma and variant bone tumors with a poor prognosis. *Cancer* 2004;**101**(1):156-63
44. Yonemoto T, Tatzaki S, Ishii T, et al. High-dose chemotherapy with autologous peripheral blood stem cell transplantation (PBSCT) for refractory bone and soft tissue sarcomas. *Gan To Kagaku Ryoho* 1999;**26**(10):1431-35

1 *Subject: Autologous HSCT following HDCT for NRSTS*

2  
3 **Figure legends**

4  
5  
6  
7  
8 **Figure 1. Literature search and study flow.**

9  
10  
11  
12  
13  
14 **Figure 2. Overall survival of individual cases with various NRSTS.**

15  
16 X-axis: below line: life years; above line: number of patients at risk; Y-axis: probability of over-  
17 all survival; +: censored. The Kaplan-Meyer analysis of overall survival was conducted using  
18 individual data of patients with NRSTS with available follow-up information (total 80, failed 46,  
19 censored 34) from 41 case series and case reports. Information about outcome (dead or alive)  
20 and follow-up (time of survival after diagnosis or begin of treatment) was required for each indi-  
21 vidual. Number of subjects at risk after each additional year of follow up.  
22  
23  
24  
25  
26  
27  
28  
29

30 Abbreviations: NRSTS: non-rhabdomyosarcoma soft tissue sarcoma  
31  
32  
33  
34  
35  
36  
37  
38  
39  
40  
41  
42  
43  
44  
45  
46  
47  
48  
49  
50  
51  
52  
53  
54  
55  
56  
57  
58  
59  
60

Subject: Autologous HSCT following HDCT for NRSTS

## Tables

Table 1. Characteristics of studies and patients

| Study                             | N. centers (country) | Enrollment; years | Prospective | N. analyzed patients | Subtype | HDCT           | Age; median years (range)       | Gender; % males |
|-----------------------------------|----------------------|-------------------|-------------|----------------------|---------|----------------|---------------------------------|-----------------|
| <b>Aggregate comparative data</b> |                      |                   |             |                      |         |                |                                 |                 |
| Bui-Nguyen 2012 [20]              | 16 (France)          | 2000 to 2008      | Yes         | 38 vs. 45            | Various | Ca-Et-If       | 46 (19 to 65) vs. 43 (18 to 65) | 58 vs. 50       |
| <b>Aggregate case series data</b> |                      |                   |             |                      |         |                |                                 |                 |
| Bertuzzi 2003 [21]                | 1 (Italy)            | 1997 to 2002      | Yes         | 10                   | DSRCT   | Me-Mi-Th       | 29 (NR)                         | 100             |
| Bisogno 2010 [22]                 | >1 (Italy)           | 1999 to 2008      | Yes         | 14                   | DSRCT   | Cy-Me-Th       | 10 (2 to 17)                    | 93              |
| Blay 2000 [23]                    | 1 (France)           | 1988 to 1994      | Yes         | 24                   | Various | Ci-Et-If       | 34 (17 to 57)                   | 57              |
| Bokemeyer 1997 [24]               | 3 (Germany)          | NR                | No          | 16                   | Various | Do-If          | 45 (25 to 57)                   | NR              |
| Cook 2012 [25]                    | 29 (USA)             | 1999 to 2007      | No          | 36                   | DSRCT   | Ca-Cy-Et-Me-Th | 19 (8 to 46)                    | 80              |
| Philippe-Chomette 2012 [26]       | >1 (France)          | 1995 to 2006      | No          | 14                   | DSRCT   | Various        | NR (4 to 29)                    | 86              |
| <b>Individual cases data</b>      |                      |                   |             |                      |         |                |                                 |                 |
| 50 studies                        | NA                   | NR                | No          | 123                  | Various | NR             | 23 (0 to 65)                    | NR              |

Abbreviations: Ca: carboplatin; Ci: cisplatin; Cy: cyclophosphamide; Do: Doxorubicin; DSRCT: desmoplastic small-round cell tumor; Et: etoposide = Vepesid = VP 16; HDCT: high-dose chemotherapy; If: ifosfamide; Me: melphalan; Mi: mitoxantrone; NA: not appropriate; NR: information not reported in the article; Th: thiotepa

Subject: Autologous HSCT following HDCT for NRSTS

Table 2. Overall survival

| Study                             | All patients assessed (95% CI)                                       |
|-----------------------------------|----------------------------------------------------------------------|
| <b>Aggregate comparative data</b> |                                                                      |
| Bui-Nguyen 2012 [20]              | 3 years: 32.7% vs. 49.4%; Hazard ratio 1.26 (0.70 to 2.29), P = 0.44 |
| <b>Aggregate case series data</b> |                                                                      |
| Bertuzzi 2003 [21]                | 2 years: 20%                                                         |
| Bisogno 2010 [22]                 | 2 years: 48%; 3 years: 38.9%                                         |
| Blay 2000 [23]                    | NR                                                                   |
| Bokemeyer 1997 [24]               | Median 13 months, range 3 to 19                                      |
| Cook 2012 [25]                    | 3 years: 40% (24 to 58)                                              |
| Philippe-Chomette 2012 [26]       | 2 years: 51.4% (23.2 to 79.6)                                        |
| <b>Individual cases data</b>      |                                                                      |
| 80 patients with follow-up data   | 2 years: 50.6% (38.7 to 62.5); 3 years: 36.7 (24.4 to 49.0)          |

Some estimates were deduced from Kaplan-Meier plot.

Abbreviation. CI: confidence interval; HSCT: haematopoietic stem cell transplantation; NR: not reported; P: p-value

1  
2  
3 *Subject: Autologous HSCT following HDCT for NRSTS*

4  
5 **Table 3. Adverse events in HSCT arm of all included studies**

6  
7

| Study                               | N. affected / N. evaluated patients               | Specification                                                 |
|-------------------------------------|---------------------------------------------------|---------------------------------------------------------------|
| <b>Treatment-related mortality</b>  |                                                   |                                                               |
| Bertuzzi 2003 [21]                  | 0 / 10                                            | NA                                                            |
| Bisogno 2010 [22]                   | 0 / 14                                            | NA                                                            |
| Blay 2000 [23]                      | 1 / 24                                            | Sudden toxic death of unknown cause at day 29                 |
| Bui-Nguyen 2012 [20]                | 1 / 38                                            | Treatment-related leukemia death 2 years after HDCT           |
| Cook 2012 [25]                      | 2 / 36                                            | Not specified                                                 |
| Doros 2008 [33]                     | 1 / 1                                             | NR                                                            |
| Engelhardt 2007 [34]                | 3 / 26                                            | Sepsis (2x); pneumonia related to lung metastases (1x)        |
| Kasper 2007 [35]                    | 1 / 16                                            | Cardiac arrest of unknown cause                               |
| Navid 2006 [36]                     | 1 / 5                                             | Liver as well as kidney failure                               |
| Philippe-Chomette 2012 [26]         | 1 / 14                                            | Died of treatment toxicity 12 months after HDCT               |
| Saab 2007 [37]                      | 2 / 4                                             | Acute myocardial infarction (1x); veno-occlusive disease (1x) |
| Slease 1988 [38]                    | 2 / 3                                             | Progressive encephalopathy (1x); sepsis (1x)                  |
| <b>Secondary neoplasia</b>          |                                                   |                                                               |
| Yamamura 2003 [39]                  | 1 / 1                                             | Chronic myelogenous leukemia                                  |
| <b>Non-haematological toxicity*</b> |                                                   |                                                               |
|                                     | <b>N. observed events / N. evaluated patients</b> |                                                               |
| Bisogno 2010 [22]                   | 1 / 14                                            | Mucositis                                                     |
| Blay 2000 [23]                      | 14 / 24                                           | Nausea, kidney, nervous system                                |
| Bokemeyer 1997 [24]                 | 6 / 16                                            | Septic episode, central nervous system                        |
| Bui-Nguyen 2012 [20]                | 10 / 38                                           | Nausea, mucositis, infection, pain                            |
| Garrido 1998 [40]                   | 1 / 1                                             | Neuroleptic malignant syndrome                                |
| Kozuka 2002 [41]                    | 1 / 1                                             | Nausea                                                        |
| Kushner 2001 [42]                   | 1 / 1                                             | Nervous system                                                |
| Patel 2004 [43]                     | 3 / 1                                             | Liver, kidney, respiratory distress                           |
| Yonemoto 1999 [44]                  | 1 / 4                                             | Liver                                                         |

8  
9  
10  
11  
12  
13  
14  
15  
16  
17  
18  
19  
20  
21  
22  
23  
24  
25  
26  
27  
28  
29  
30  
31  
32  
33  
34

35 \*National Cancer Institute (NCI) Common Terminology Criteria for Adverse Events (CTCAE) grade III to IV[13]

36 Abbreviation. 1x: one item; 2x: two items; HDCT: high-dose chemotherapy; N.: number; NA: not applicable; NR: not reported

*Subject: Autologous HSCT following HDCT for NRSTS*

1  
2  
3  
4  
5  
6  
7  
8  
9  
10  
11  
12  
13  
14  
15  
16  
17  
18  
19  
20  
21  
22  
23  
24  
25  
26  
27  
28  
29  
30  
31  
32  
33  
34  
35  
36  
37  
38  
39  
40  
41  
42  
43  
44  
45  
46  
47  
48  
49  
50  
51  
52  
53  
54  
55  
56  
57  
58  
59  
60

For peer review only

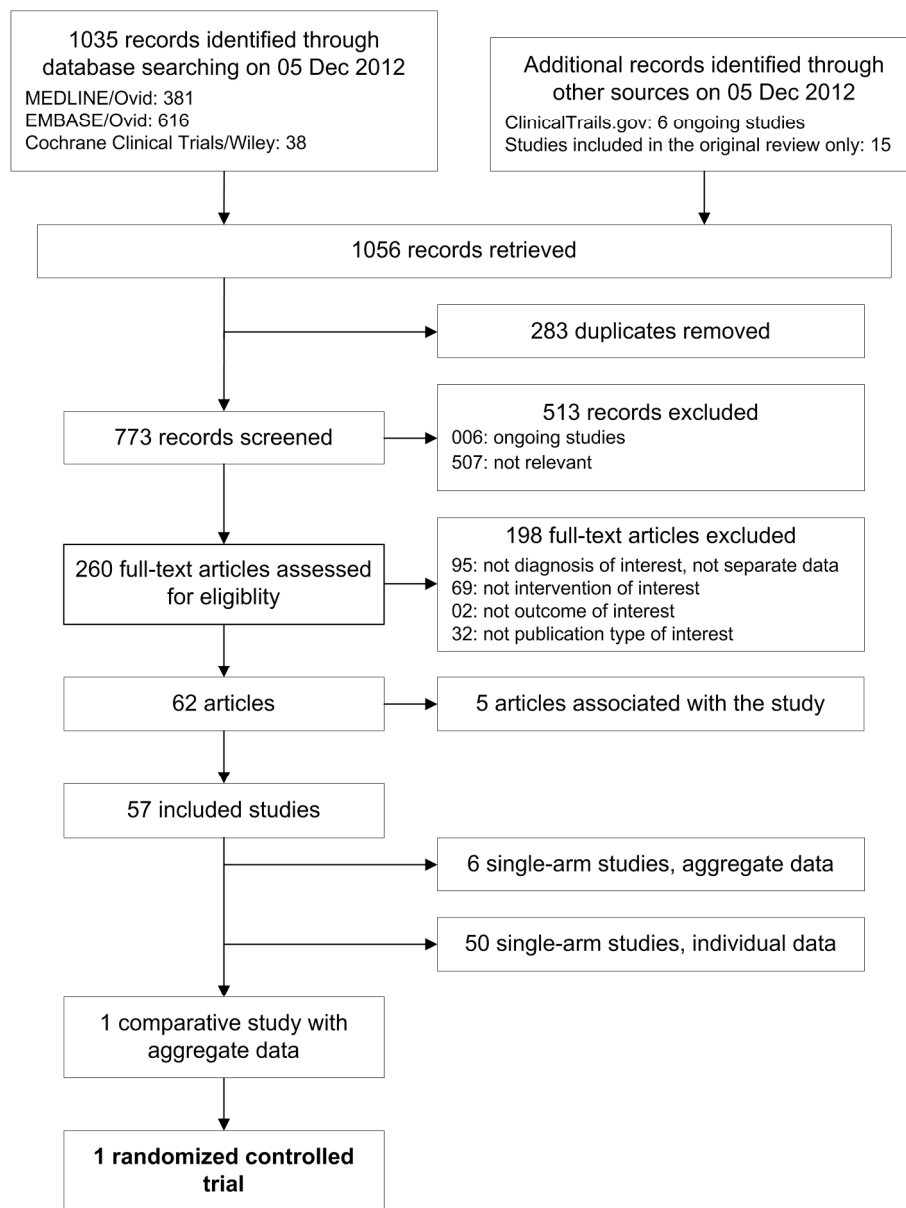

Figure 1. Literature search and study flow.  
170x225mm (300 x 300 DPI)

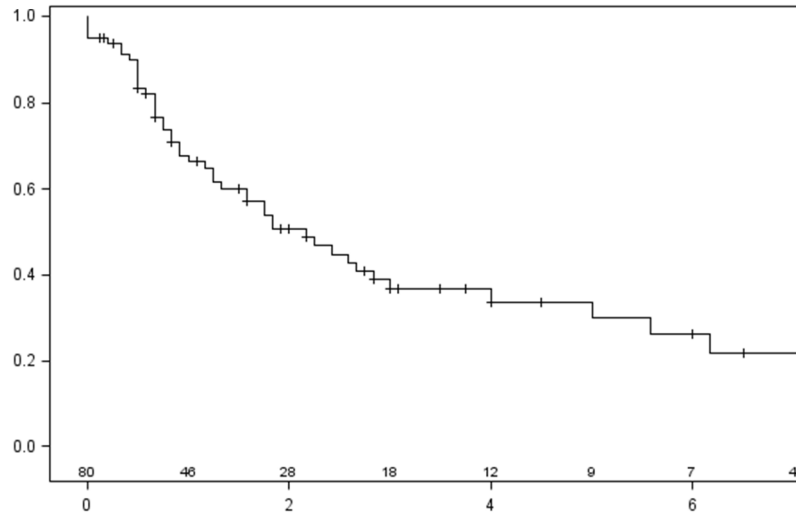

Figure 2. Overall survival of individual cases with various NRSTS.

X-axis: below line: life years; above line: number of patients at risk; Y-axis: probability of overall survival; +: censored. The Kaplan-Meier analysis of overall survival was conducted using individual data of patients with NRSTS with available follow-up information (total 80, failed 46, censored 34) from 41 case series and case reports. Information about outcome (dead or alive) and follow-up (time of survival after diagnosis or begin of treatment) was required for each individual. Number of subjects at risk after each additional year of follow up.

Abbreviations: NRSTS: non-rhabdomyosarcoma soft tissue sarcoma

297x209mm (300 x 300 DPI)

only



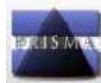

# PRISMA 2009 Checklist

| Section/topic                      | #  | Checklist item                                                                                                                                                                                                                                                                                              | Reported on page #     |
|------------------------------------|----|-------------------------------------------------------------------------------------------------------------------------------------------------------------------------------------------------------------------------------------------------------------------------------------------------------------|------------------------|
| <b>TITLE</b>                       |    |                                                                                                                                                                                                                                                                                                             |                        |
| Title                              | 1  | Identify the report as a systematic review, meta-analysis, or both.                                                                                                                                                                                                                                         | 1                      |
| <b>ABSTRACT</b>                    |    |                                                                                                                                                                                                                                                                                                             |                        |
| Structured summary                 | 2  | Provide a structured summary including, as applicable: background; objectives; data sources; study eligibility criteria, participants, and interventions; study appraisal and synthesis methods; results; limitations; conclusions and implications of key findings; systematic review registration number. | 2 to 3                 |
| <b>INTRODUCTION</b>                |    |                                                                                                                                                                                                                                                                                                             |                        |
| Rationale                          | 3  | Describe the rationale for the review in the context of what is already known.                                                                                                                                                                                                                              | 4                      |
| Objectives                         | 4  | Provide an explicit statement of questions being addressed with reference to participants, interventions, comparisons, outcomes, and study design (PICOS).                                                                                                                                                  | 4                      |
| <b>METHODS</b>                     |    |                                                                                                                                                                                                                                                                                                             |                        |
| Protocol and registration          | 5  | Indicate if a review protocol exists, if and where it can be accessed (e.g., Web address), and, if available, provide registration information including registration number.                                                                                                                               | not applicable         |
| Eligibility criteria               | 6  | Specify study characteristics (e.g., PICOS, length of follow-up) and report characteristics (e.g., years considered, language, publication status) used as criteria for eligibility, giving rationale.                                                                                                      | 5                      |
| Information sources                | 7  | Describe all information sources (e.g., databases with dates of coverage, contact with study authors to identify additional studies) in the search and date last searched.                                                                                                                                  | 5 to 6                 |
| Search                             | 8  | Present full electronic search strategy for at least one database, including any limits used, such that it could be repeated.                                                                                                                                                                               | in the Cochrane review |
| Study selection                    | 9  | State the process for selecting studies (i.e., screening, eligibility, included in systematic review, and, if applicable, included in the meta-analysis).                                                                                                                                                   | 5 to 6                 |
| Data collection process            | 10 | Describe method of data extraction from reports (e.g., piloted forms, independently, in duplicate) and any processes for obtaining and confirming data from investigators.                                                                                                                                  | 5 to 6                 |
| Data items                         | 11 | List and define all variables for which data were sought (e.g., PICOS, funding sources) and any assumptions and simplifications made.                                                                                                                                                                       | 5 to 6                 |
| Risk of bias in individual studies | 12 | Describe methods used for assessing risk of bias of individual studies (including specification of whether this was done at the study or outcome level), and how this information is to be used in any data synthesis.                                                                                      | 6                      |
| Summary measures                   | 13 | State the principal summary measures (e.g., risk ratio, difference in means).                                                                                                                                                                                                                               | 6                      |

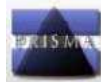

## PRISMA 2009 Checklist

Page 1 of 2

|                      |    |                                                                                                                                                           |   |
|----------------------|----|-----------------------------------------------------------------------------------------------------------------------------------------------------------|---|
| Synthesis of results | 14 | Describe the methods of handling data and combining results of studies, if done, including measures of consistency (e.g., $I^2$ ) for each meta-analysis. | 6 |
|----------------------|----|-----------------------------------------------------------------------------------------------------------------------------------------------------------|---|

| Section/topic               | #  | Checklist item                                                                                                                                   | Reported on page # |
|-----------------------------|----|--------------------------------------------------------------------------------------------------------------------------------------------------|--------------------|
| Risk of bias across studies | 15 | Specify any assessment of risk of bias that may affect the cumulative evidence (e.g., publication bias, selective reporting within studies).     | 6                  |
| Additional analyses         | 16 | Describe methods of additional analyses (e.g., sensitivity or subgroup analyses, meta-regression), if done, indicating which were pre-specified. | 6                  |

**RESULTS**

|                               |    |                                                                                                                                                                                                          |                        |
|-------------------------------|----|----------------------------------------------------------------------------------------------------------------------------------------------------------------------------------------------------------|------------------------|
| Study selection               | 17 | Give numbers of studies screened, assessed for eligibility, and included in the review, with reasons for exclusions at each stage, ideally with a flow diagram.                                          | figure 1               |
| Study characteristics         | 18 | For each study, present characteristics for which data were extracted (e.g., study size, PICOS, follow-up period) and provide the citations.                                                             | 7, table 1             |
| Risk of bias within studies   | 19 | Present data on risk of bias of each study and, if available, any outcome level assessment (see item 12).                                                                                                | in the Cochrane review |
| Results of individual studies | 20 | For all outcomes considered (benefits or harms), present, for each study: (a) simple summary data for each intervention group (b) effect estimates and confidence intervals, ideally with a forest plot. | 8, table 2 to 3        |
| Synthesis of results          | 21 | Present results of each meta-analysis done, including confidence intervals and measures of consistency.                                                                                                  | table 2, figure 2      |
| Risk of bias across studies   | 22 | Present results of any assessment of risk of bias across studies (see Item 15).                                                                                                                          | in the Cochrane review |
| Additional analysis           | 23 | Give results of additional analyses, if done (e.g., sensitivity or subgroup analyses, meta-regression [see Item 16]).                                                                                    | none                   |

**DISCUSSION**

|                     |    |                                                                                                                                                                                      |          |
|---------------------|----|--------------------------------------------------------------------------------------------------------------------------------------------------------------------------------------|----------|
| Summary of evidence | 24 | Summarize the main findings including the strength of evidence for each main outcome; consider their relevance to key groups (e.g., healthcare providers, users, and policy makers). | 10       |
| Limitations         | 25 | Discuss limitations at study and outcome level (e.g., risk of bias), and at review-level (e.g., incomplete retrieval of identified research, reporting bias).                        | 10 to 11 |
| Conclusions         | 26 | Provide a general interpretation of the results in the context of other evidence, and implications for future research.                                                              | 12       |

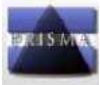

# PRISMA 2009 Checklist

| FUNDING |    |                                                                                                                                            |    |
|---------|----|--------------------------------------------------------------------------------------------------------------------------------------------|----|
| Funding | 27 | Describe sources of funding for the systematic review and other support (e.g., supply of data); role of funders for the systematic review. | 13 |

From: Moher D, Liberati A, Tetzlaff J, Altman DG, The PRISMA Group (2009). Preferred Reporting Items for Systematic Reviews and Meta-Analyses: The PRISMA Statement. PLoS Med 6(6): e1000097. doi:10.1371/journal.pmed1000097

For more information, visit: [www.prisma-statement.org](http://www.prisma-statement.org).

Page 2 of 2

# BMJ Open

## Autologous haematopoietic stem cell transplantation following high-dose chemotherapy for non-rhabdomyosarcoma soft tissue sarcomas – a Cochrane Systematic Review

|                                 |                                                                                                                                                                    |
|---------------------------------|--------------------------------------------------------------------------------------------------------------------------------------------------------------------|
| Journal:                        | <i>BMJ Open</i>                                                                                                                                                    |
| Manuscript ID:                  | bmjopen-2014-005033.R1                                                                                                                                             |
| Article Type:                   | Research                                                                                                                                                           |
| Date Submitted by the Author:   | 26-Jun-2014                                                                                                                                                        |
| Complete List of Authors:       | Peinemann, Frank; University of Cologne, Children's Hospital Labeit, Alexander; University of Illinois College of Medicine at Peoria, Center for Outcomes Research |
| <b>Primary Subject Heading</b>: | Oncology                                                                                                                                                           |
| Secondary Subject Heading:      | Haematology (incl blood transfusion), Pharmacology and therapeutics                                                                                                |
| Keywords:                       | Sarcoma < ONCOLOGY, CHEMOTHERAPY, Bone marrow transplantation < HAEMATOLOGY                                                                                        |
|                                 |                                                                                                                                                                    |

SCHOLARONE™  
Manuscripts

1 *Subject: bmjopen-2014-005033.R1: Autologous HSCT following HDCT for NRSTS*

2  
3 **Autologous haematopoietic stem cell transplantation following high-dose chemotherapy for**  
4 **non-rhabdomyosarcoma soft tissue sarcomas – a Cochrane Systematic Review\***  
5

6  
7 Frank Peinemann,<sup>1†</sup> Alexander M. Labeit,<sup>2</sup>

8  
9 <sup>1</sup>Children's Hospital, University of Cologne, Cologne, Germany

10  
11 <sup>2</sup>Center for Outcomes Research, University of Illinois College of Medicine at Peoria, Illinois,  
12  
13 USA

14  
15  
16 \*This article is based on a Cochrane Systematic Review published in the Cochrane Database of  
17 Systematic Reviews (CDSR) 2013, Issue 8. Art. No.: CD008216. DOI:

18 10.1002/14651858.CD008216.pub4. (see [www.thecochranelibrary.com](http://www.thecochranelibrary.com) for information).

19  
20  
21 Cochrane Systematic Reviews are regularly updated as new evidence emerges and in response to  
22 feedback, and the CDSR should be consulted for the most recent version of the review.  
23

24  
25  
26 †Corresponding author: Frank Peinemann, M.D., M.Sc., Children's Hospital, University of Co-  
27 logne, Kerpener Str. 62, 50937 Cologne, Germany. E-mail: [pubmedprjournal@gmail.com](mailto:pubmedprjournal@gmail.com).

28  
29 Phone: +49 (176) 31130745. Fax: +49 (221) 356851.  
30

31  
32  
33 E-mail addresses:

34 FP: [pubmedprjournal@gmail.com](mailto:pubmedprjournal@gmail.com)

35  
36 AL: [alabeit.publications@gmail.com](mailto:alabeit.publications@gmail.com)  
37  
38  
39  
40  
41  
42  
43  
44  
45  
46  
47  
48  
49  
50  
51  
52  
53  
54  
55  
56  
57  
58  
59  
60

1  
2  
3  
4  
5  
6  
7  
8  
9  
10  
11  
12  
13  
14  
15  
16  
17  
18  
19  
20  
21  
22  
23  
24  
25  
26  
27  
28  
29  
30  
31  
32  
33  
34  
35  
36  
37  
38  
39  
40  
41  
42  
43  
44  
45  
46  
47  
48  
49  
50  
51  
52  
53  
54  
55  
56  
57  
58  
59  
60

*Subject: bmjopen-2014-005033.R1: Autologous HSCT following HDCT for NRSTS*

## Abstract

Objectives: We conducted a systematic review to compare the efficacy and adverse events of autologous haematopoietic stem cell transplantation (HSCT) following high-dose chemotherapy (HDCT) versus standard-dose chemotherapy (SDCT) in patients with locally advanced or meta-static non-rhabdomyosarcoma soft tissue sarcomas (NRSTS).

Setting: Patients were observed in hospital units specialised for cancer therapy.

Participants: The review evaluated 294 patients with 19 different subtypes of malignant NRSTS. The patients had a median age between 10 and 46 yerars of age (range 2 to 65) and were mostly males.

Primary and secondary outcome measure: The planned and measured primary outcomes were overall survival and treatment-related mortality. The planned and measured secondary outcomes were progression-free survival, grade 3 to 4 non-haematological toxicity, and secondary neo-plasia. Other secondary outcomes including disease-free survival, event-free survival, and health-related quality of life were not reported.

Results: We included 62 studies reporting on 294 transplanted patients. We identified one ran-domised controlled trial (RCT) with 38 transplanted and 45 non-transplated patients and judged a low riks of bias. We further identified 61 single-arm studies with 256 transplanted patients. Overall survival in the RCT was reported not statistically significantly different between autolo-gous HSCT following HDCT versus SDCT. The hazard ratio was 1.26 (95% confidence interval 0.70 to 2.29; P = 0.44) and the point estimates at three years were 32.7% versus 49.4%. Data from single-arm studies were used to extract data on adverse events. Treatment-related mortality was reported in 5.1% (15 of 294) transplanted patients.

1 *Subject: bmjopen-2014-005033.R1: Autologous HSCT following HDCT for NRSTS*

2  
3 Conclusion: Overall survival in patients with locally advanced or metastatic NRSTS was not  
4 statistically different after autologous HSCT following HDCT compared to SDCT in a single  
5 RCT with a total of 83 patients. No other comparative study was available. The proportion of  
6  
7  
8  
9  
10 adverse events among the transplanted patients is not clear.  
11  
12  
13  
14  
15  
16  
17  
18  
19  
20  
21  
22  
23  
24  
25  
26  
27  
28  
29  
30  
31  
32  
33  
34  
35  
36  
37  
38  
39  
40  
41  
42  
43  
44  
45  
46  
47  
48  
49  
50  
51  
52  
53  
54  
55  
56  
57  
58  
59  
60

For peer review only

1 *Subject: bmjopen-2014-005033.R1: Autologous HSCT following HDCT for NRSTS*

2  
3 **Keywords**

4  
5  
6 Systematic review, soft tissue sarcomas, high-dose chemotherapy, autologous haematopoietic  
7  
8 stem cell transplantation  
9

10  
11 **Strengths and limitations of this study**

- 12  
13  
14  
15 • We conducted a comprehensive literature search and strictly adhered to the projected  
16 methodology.  
17  
18  
19 • The WHO classification of soft tissue sarcomas was adopted and modified to define a  
20 clear terminology for the study selection process.  
21  
22  
23  
24 • We judged a low risk of bias for the single identified RCT, which may serve as the major  
25 relevant evidence.  
26  
27  
28 • Single-arm studies provided some estimation about serious adverse events with trans-  
29 plantation  
30  
31  
32  
33 • Some treatments were performed 10 to 20 years ago. Thus, the results may not be appli-  
34 cable to patients who are treated today.  
35  
36  
37  
38 • The included studies report various subtypes of non-rhabdomyosarcoma soft tissue sar-  
39 comas and each tumor type may carry an individual risk profile and, therefore, ideally  
40 should be evaluated separately.  
41  
42  
43  
44  
45  
46  
47  
48  
49  
50  
51  
52  
53  
54  
55  
56  
57  
58  
59  
60



*Subject: bmjopen-2014-005033.R1: Autologous HSCT following HDCT for NRSTS*

1  
2  
3  
4  
5  
6  
7  
8  
9  
10  
11  
12  
13  
14  
15  
16  
17  
18  
19  
20  
21  
22  
23  
24  
25  
26  
27  
28  
29  
30  
31  
32  
33  
34  
35  
36  
37  
38  
39  
40  
41  
42  
43  
44  
45  
46  
47  
48  
49  
50  
51  
52  
53  
54  
55  
56  
57  
58  
59  
60

| <b>Abbreviation</b> | <b>Term</b>                               |
|---------------------|-------------------------------------------|
| HDCT                | High-dose chemotherapy                    |
| HSCT                | Haematopoietic stem cell transplantation  |
| MFH                 | Malignant Fibrous Histiocytoma            |
| NRSTS               | Non-rhabdomyosarcoma soft tissue sarcomas |
| RCT                 | Randomised controlled trial               |
| SDCT                | Standard-dose chemotherapy                |

For peer review only

1  
2  
3  
4  
5  
6  
7  
8  
9  
10  
11  
12  
13  
14  
15  
16  
17  
18  
19  
20  
21  
22  
23  
24  
25  
26  
27  
28  
29  
30  
31  
32  
33  
34  
35  
36  
37  
38  
39  
40  
41  
42  
43  
44  
45  
46  
47  
48  
49  
50  
51  
52  
53  
54  
55  
56  
57  
58  
59  
60

*Subject: bmjopen-2014-005033.R1: Autologous HSCT following HDCT for NRSTS*

## Introduction

Soft tissue sarcomas (STS) are a highly heterogeneous group of rare malignant solid tumors of non-epithelial extraskelatal body tissue and are classified on a histogenetic basis[1]. The location of the primary tumor can involve any area of the body[2]. STS can involve any type of tissue and typically affect muscles, tendons, adipose tissue, blood vessels and joints and commonly present as a painless mass[3]. In this review we investigated non-rhabdomyosarcoma soft tissue sarcomas (NRSTS) provided that they are categorized as malignant according to the World Health Organization (WHO) 2002 classification[4]. In Western countries about four new cases of NRSTS are estimated per 100,000 population every year, with the Ewing family of tumors excluded from this statistic [5].

Surgery is the standard treatment for localized NRSTS and can be curative if distant dissemination is not present[6 7]. Chemotherapy is regarded mainly as a palliative treatment for high-risk patients who are characterized by inoperable, locally advanced and metastatic disease[6]. Riedel 2012 provides an overview of current systemic therapies and discusses possible novel therapeutic agents and treatment strategies[8]. High-dose chemotherapy (HDCT) has been evaluated as an alternative treatment option for high-risk patients. The rationale for HDCT is that escalating doses of HDCT may increase survival by capturing putatively remnant malignant cells[9]. The rationale for autologous haematopoietic stem cell transplantation (HSCT) following HDCT is a planned rescue for HDCT-related severe haematologic toxicity[9]. The primary objective of the present systematic review is to evaluate effectiveness and adverse events of autologous HSCT following HDCT in patients with advanced or metastatic NRSTS.

1 *Subject: bmjopen-2014-005033.R1: Autologous HSCT following HDCT for NRSTS*

## 2 3 **Methods**

4  
5 This article is based on a Cochrane Systematic Review published in The Cochrane Library[10].  
6  
7 Publication of this work is in agreement with the policy of The Cochrane Collaboration[11].  
8  
9 While preparing this systematic review, we endorsed the PRISMA statement, adhered to its prin-  
10  
11 ciples and conformed to its checklist[12].  
12  
13

### 14 15 **Study inclusion criteria**

16  
17 We included patients with NRSTS provided that they are categorized as malignant according to  
18  
19 the World Health Organization (WHO) 2013 classification on soft tissue sarcomas[4] as well as  
20  
21 malignant haemangiopericytoma and anaplastic sarcoma. We excluded the Ewing family of tu-  
22  
23 mors according to the European Society for Medical Oncology (ESMO) Guidelines Working  
24  
25 Group[5], chondrosarcomas, osteosarcomas, and rhabdomyosarcomas. While writing the  
26  
27 Cochrane Review, we referred to the WHO 2002 classification [13]. For the purpose of the pre-  
28  
29 sent systematic review, we updated the inclusion criteria and re-evaluated the potentially relevant  
30  
31 studies and included the following entities: 'Gastrointestinal Stromal Tumours', 'Malignant pe-  
32  
33 ripheral nerve sheath tumor', 'Undifferentiated pleomorphic sarcoma not otherwise specified'.  
34  
35 Almost all published studies refer to the 2002 classification. Thus, we continued to include the  
36  
37 following entities, though, they were removed and relocated within the 2013 classification:  
38  
39 'malignant fibrous histiocytoma' (MFH), 'undifferentiated sarcoma', 'unclassified sarcoma', and  
40  
41 'haemangiopericytoma'. **Table 1** compares the categories and malignant subtypes of the 2013  
42  
43 versus the 2002 edition of the WHO classification of tumours of soft tissue and indicates which  
44  
45 of those are included in the present systematic review. Participants were included regardless of  
46  
47 age, severity, and clinical stage of disease. Studies were included as long as at least 80% of pa-  
48  
49 tients had NRSTS and received the test intervention. The test intervention was autologous HSCT  
50  
51 following HDCT containing stem cells from peripheral blood or bone marrow. The comparator  
52  
53 was standard-dose chemotherapy. The primary outcomes were overall survival and treatment-  
54  
55  
56  
57  
58  
59  
60

1 *Subject: bmjopen-2014-005033.R1: Autologous HSCT following HDCT for NRSTS*

2 related mortality. Secondary outcomes were disease-free survival, progression-free survival,  
3 event-free survival, non-haematological toxicity grades 3 to 4[14], secondary malignant neo-  
4 plasia, and health-related quality of life.  
5  
6  
7  
8

### 9 10 **Search strategy, selection of studies, and data extraction**

11 We conducted an electronic literature database search in MEDLINE (Ovid), EMBASE (Ovid),  
12 and Cochrane Library CENTRAL (Wiley) including articles published from inception to an up-  
13 date search on 12 June 2014. The corresponding search strategies have been published in the  
14 corresponding Cochrane Review [10]. We retrieved all titles and abstracts by electronic search-  
15 ing and downloaded them to the reference management database EndNote Version X3[15]. We  
16 considered studies written in languages other than English. We searched the online registries[16  
17 17] on 12 June 2014 for additional completed or ongoing studies using the search strategy "sar-  
18 coma AND chemotherapy AND transplantation". We searched all retrieved abstracts of annual  
19 meetings contained in EMBASE (Ovid). We contacted authors to replenish missing information.  
20 All data assessments were performed independently by two independent review authors. We re-  
21 solved differences by discussion or by appeal to a third review author. We judged whether the  
22 autologous HSCT following HDCT could be regarded as a consolidation or a salvage therapy. A  
23 consolidation therapy is a treatment that is given after cancer has disappeared following the ini-  
24 tial therapy and a salvage therapy is a treatment that is given after the cancer has not responded  
25 to other treatments[18]. We considered a consolidation therapy if the status at transplantation  
26 was either a complete or a partial response to the preceding therapy and we considered a salvage  
27 therapy if the status was less favourable and in case a relapse was described.  
28  
29  
30  
31  
32  
33  
34  
35  
36  
37  
38  
39  
40  
41  
42  
43  
44  
45  
46  
47  
48  
49

### 50 51 **Assessment of risk of bias in included studies**

52 We have used four criteria from The Cochrane Collaboration's tool for assessing risk of bias in  
53 randomised controlled trials (RCTs)[19]: random sequence generation, allocation concealment,  
54  
55  
56  
57  
58  
59  
60

1 *Subject: bmjopen-2014-005033.R1: Autologous HSCT following HDCT for NRSTS*

2  
3 blinding of outcome assessment, and selective reporting such as not reporting pre-specified out-  
4 comes. We extended the Cochrane tool for assessing risk of bias by five criteria that consider  
5 nonrandomised studies: prospective design, comparable baseline characteristics, assignment of  
6 patients to treatment groups, concurrent control, and loss to follow-up. We applied The Cochrane  
7 Collaboration's criteria for judging risk of bias[20].  
8  
9  
10  
11  
12

### 13 **Data synthesis**

14  
15 We synthesized aggregate data as narrative because data were too scarce to be pooled. In  
16 difference to the Cochrane Review, we did not pool time-to-event data on overall survival from  
17 studies with individual data. With respect to survival data, we accepted time of diagnosis and  
18 beginning of treatment as starting points. We evaluated all 62 studies to search for reports on  
19 treatment-related mortality and tabulated the identified patient data. We evaluated the 7 studies  
20 reporting aggregate data to search for reports on grade 3 to 4 non-haematological toxicity in the  
21 autologous HSCT following HDCT arm and tabulated the identified event data.  
22  
23  
24  
25  
26  
27  
28  
29  
30  
31  
32  
33  
34  
35  
36  
37  
38  
39  
40  
41  
42  
43  
44  
45  
46  
47  
48  
49  
50  
51  
52  
53  
54  
55  
56  
57  
58  
59  
60

Subject: *bmjopen-2014-005033.R1: Autologous HSCT following HDCT for NRSTS*

## Results

### Search results

**Figure 1** shows the literature search and study flow. We retrieved 1035 records and evaluated 260 fulltext papers in detail. We included 62 studies with 294 transplanted patients, one RCT with 38 transplanted and 45 non-transplanted patients[21], six single-arm studies reporting aggregate case series data[22-27], and 55 single-arm studies with individual data. In online registries, we identified six studies with a still pending completion and we did not find additional studies in the update search.

### Baseline data

We provide an overview of the main characteristics of studies and treatment (**Table 2**), of the patients (**Table 3**), and of the frequency of the identified subtypes (**Table 4**). The one RCT was an open, multicenter, randomised phase III study with two parallel treatment groups[21]. Patients were eligible for randomisation if they had responded to chemotherapy or, for stable disease, if a complete surgical resection of all disease sites could be carried out. The intention-to-treat principle was modified to exclude patients found to be ineligible at a histological review after randomisation. Three of the six single-arm studies reporting aggregate case series data collected the data prospectively[22-24] and three retrospectively[25-27]. Data from the remaining 55 single-arm studies were considered for the description of treatment-related mortality only.

The 62 studies were set in 13 different countries in four different continents. Most of the transplanted patients were studied in France, the United States, and Germany. We assume that most patients in the studies reporting aggregate case series data received autologous HSCT following HDCT as a consolidation therapy, whereas a considerable number of the individual case data were associated with autologous HSCT following HDCT as a rescue therapy. The majority of all studies used peripheral blood stem cell transplants. Median age varied roughly between 19 and

1 *Subject: bmjopen-2014-005033.R1: Autologous HSCT following HDCT for NRSTS*

2  
3 46 years and there was a male preponderance. Patients had 19 different relevant histological di-  
4  
5 gnososes. Most patients had desmoplastic small round-cell tumor (N = 109 of 294) followed by  
6  
7 the new category of undifferentiated pleomorphic sarcomas (N = 61), which is composed of  
8  
9 MFH (N = 31), unclassified sarcoma (N = 17), and undetermined sarcoma (N = 13).  
10

### 11 **Primary outcome**

12  
13 Overall survival was not statistically significantly different in the RCT by Bui-Nguyen 2012 be-  
14  
15 tween autologous HSCT following HDCT versus SDCT regarding the hazard ratio of 1.26 (95%  
16  
17 CI 0.70 to 2.29; P = 0.44)[21] (**Table 5**). In this RCT, the point estimates at three years were  
18  
19 32.7% versus 49.4% based on 8 versus 17 remaining patients at risk. The patients at risk at base-  
20  
21 line were 38 versus 45 patients. With respect to the studies reporting aggregate case series data,  
22  
23 overall survival for transplanted patients ranged roughly from 20% to 51% at 2 years and from  
24  
25 32% to 40% at three years (**Table 5**). In 10 studies, treatment-related mortality (TRM) was asso-  
26  
27 ciated with 15 of 137 evaluated patients (**Table 6**). Assuming no other TRM in the rest of 157  
28  
29 patients, a risk for procedure-related death might be estimated as 5.1% (15 of 294).  
30  
31  
32  
33  
34  
35

### 36 **Secondary outcomes**

37  
38 Progression-free survival was also not statistically significantly different in the RCT by Bui-  
39  
40 Nguyen 2012 between autologous HSCT following HDCT versus SDCT regarding the hazard  
41  
42 ratio of 1.34(95% CI 0.81 to 2.20; P = 0.25)[21]. In this RCT, the point estimates at three years  
43  
44 were 9.3% versus 21.6% based on 3 versus 12 remaining patients at risk. The RCT did not report  
45  
46 results on disease-free survival and event-free survival. An overview of the number of events of  
47  
48 non-haematological toxicity grade 3 to 4 is provided in **Table 7**. In the RCT, 11 events were ob-  
49  
50 served in 38 transplanted patients and 1 event (asthenia) was reported regarding the standard-  
51  
52 dose chemotherapy arm. In 3 of the studies reporting aggregate case series data, 25 events were  
53  
54 observed in 54 transplanted patients in the HSCT arm. The other 3 studies did not report toxicity  
55  
56  
57  
58  
59  
60

1 *Subject: bmjopen-2014-005033.R1: Autologous HSCT following HDCT for NRSTS*

2  
3 data. We identified one secondary neoplasia in a single case report. Health-related quality of life  
4  
5 scales were not addressed in the included studies.  
6  
7

### 8 **Data quality**

9  
10 Clinical heterogeneity was substantial because tumor subdiagnosis varied considerable between  
11  
12 patients. Furthermore, tumor stage and metastasis was not reported for all participants. The RCT  
13  
14 by Bui-Nguyen 2012[21] stands out as it is the only study reporting comparative data. We  
15  
16 judged a low risk of bias for this trial for random sequence generation and selective reporting.  
17  
18 However, the trial does have some drawbacks. We judged an unclear risk for allocation con-  
19  
20 cealment because masking of allocation was not described in full detail. We judged a high risk of  
21  
22 bias for blinding of outcome assessment because it was not reported for any outcome. The other  
23  
24 61 of 62 studies are single-arm studies and are therefore not qualified for assessing a treatment  
25  
26 effect.  
27  
28  
29  
30  
31  
32  
33  
34  
35  
36  
37  
38  
39  
40  
41  
42  
43  
44  
45  
46  
47  
48  
49  
50  
51  
52  
53  
54  
55  
56  
57  
58  
59  
60



1 *Subject: bmjopen-2014-005033.R1: Autologous HSCT following HDCT for NRSTS*

## 2 3 **Discussion**

### 4 5 **Outcomes**

6  
7  
8 We identified one randomised controlled trial comparing autologous HSCT following HDCT  
9  
10 versus SDCT[21]. The authors reported a difference in overall survival and progression-free sur-  
11  
12 vival after the treatment in favour of SDCT but the difference was not statistically significant,  
13  
14 respectively. Therefore, there is evidence that patients may not have a better survival after autol-  
15  
16 ogous HSCT following HDCT versus SDCT. If at all, this intervention should only be offered  
17  
18 after careful consideration and preferably only within a randomised controlled clinical trial. We  
19  
20 estimated a treatment-related mortality of 5.1%, which was somewhat higher than 2.0% reported  
21  
22 by others[28]. Severe toxicity grade 3 to 4 was sparsely reported. Studies on health-related quali-  
23  
24 ty of life were not identified. The frequency of secondary neoplasia in 1 of 294 participants is  
25  
26 probably an extreme underestimation of the true frequency due to a relatively short follow-up.  
27  
28 The detection of secondary neoplasia depends on a long follow-up and was estimated from 4.0%  
29  
30 to 6.9% by others[29 30].  
31  
32  
33  
34

### 35 36 **The WHO 2013 classification**

37  
38 The WHO recently published the 2013 classification on soft tissue sarcomas[4]. The authors  
39  
40 inserted the category 'Undifferentiated Pleomorphic Sarcoma Not Otherwise Specified' to lodge  
41  
42 those types of soft tissue sarcomas that are difficult to classify using the current available tech-  
43  
44 niques[31 32]. The authors integrated the terms 'MFH', 'Undifferentiated Sarcoma', and 'Unclas-  
45  
46 sified Sarcoma' into this newly created category. MFH was characterized by a apparent lack of  
47  
48 specific differentiation[33] and it was considered a diagnosis of exclusion[34]. MFH was regard-  
49  
50 ed as the most common soft tissue sarcoma of adulthood[33] and accounted for up to 25% of  
51  
52 patients in clinical trials on soft tissue sarcoma[34]. In 1992, Fletcher et al. reassessed 159 cases  
53  
54 with MFH and found 63% (97 of 159) tumors to be specific sarcomas other than MFH[33]. In  
55  
56 2001, Fletcher et al. confirmed that 84% (84 of 100) tumors of patients with MFH showed suffi-  
57  
58  
59  
60

1 *Subject: bmjopen-2014-005033.R1: Autologous HSCT following HDCT for NRSTS*

2  
3  
4  
5  
6  
7  
8  
9  
10  
11  
12  
13  
14  
15  
16  
17  
18  
19  
20  
21  
22  
23  
24  
25  
26  
27  
28  
29  
30  
31  
32  
33  
34  
35  
36  
37  
38  
39  
40  
41  
42  
43  
44  
45  
46  
47  
48  
49  
50  
51  
52  
53  
54  
55  
56  
57  
58  
59  
60

cient differentiation to assign them to specific subtypes of soft tissue sarcomas[35]. The techniques to assess cell differentiation have been substantially improved with the effect that the frequency of the tumor within this category has decreased[36]. It was supposed that the category of 'Undifferentiated Sarcoma – Otherwise Not Specified' may contain liposarcoma, fibrosarcoma, leiomyosarcoma, rhabdomyosarcoma, other sarcomas, and even carcinomas or lymphomas[36 37]. It was estimated that pathologist might have difficulties to identify a specific differentiation in 10% to15% of tumors previously called MFH[37]. The new edition also removed the term 'Haemangiopericytoma'[31 32]. 'Gastrointestinal Stromal tumours' and 'Nerve Sheath tumours' were relocated from other classifications and appear for the first time in the soft tissue classifications[31 32]. Consequently, the term 'Malignant Peripheral Nerve Sheath Tumor' is newly integrated.

### Strengths and limitations

The search strategy was broad to aim for the retrieval of all relevant studies. With respect to historical versions of the Cochrane Review[10], we applied two different search strategies and retrieved the same studies with aggregate data but different studies with individual cases data. This results show the substantial difficulty associated with the aim of searching for all published case. This enterprise appears almost impossible. We adopted the new WHO 2013 classification of soft tissue sarcomas and exerted minor modifications to define a clear terminology for the study selection process. The group of NRSTS consists of many subtypes that are difficult to diagnose and separate even today. A considerable number of tumors cannot clearly assigned to a specific histologic category. Thus, we may have tumors with a specific label that might not be true. Otherwise, we may have tumors without a specific label that might belong to a specific category. We excluded studies if the proportion of non-eligible participants were greater or equal to 20% of the total population to prevent considerable mixture with disease or interventions that are not included in the present review. Authors were contacted to ask for additional data. We judged a low risk

1 *Subject: bmjopen-2014-005033.R1: Autologous HSCT following HDCT for NRSTS*

2 of bias for the one identified RCT, which may serve as the major relevant evidence. All other  
3 identified studies were single-arm studies that are not helpful to decide whether autologous  
4 HSCT following HDCT for NRSTS is a meaningful treatment option. Therefore, we removed  
5 survival data of studies reporting individual data. Nevertheless, they provided data for estimation  
6 about treatment-related mortality within all included transplanted patients. We also removed  
7 data on non-haematological toxicity of studies reporting individual data because the sparse re-  
8 porting might have caused a display of not representative information. The description of consol-  
9 idation and salvage therapy is based on our judgement and might be judged different by others.  
10 These types of therapy were not precisely reported in most studies. Some treatments were per-  
11 formed 10 to 20 years ago. Thus, the results may not be applicable to patients who are treated  
12 today. All studies report various subtypes of NRSTS and each tumor type may carry an individu-  
13 al risk profile and, therefore, ideally should be evaluated separately. With respect to the individ-  
14 ual survival data, follow-up started at different time points, that is, at diagnosis or at start of  
15 treatment. The delay between diagnosis and starting high-dose chemotherapy can be considera-  
16 ble.  
17  
18  
19  
20  
21  
22  
23  
24  
25  
26  
27  
28  
29  
30  
31  
32  
33  
34  
35  
36

### 37 **Other findings and opinions**

38 We want to point out that some authors have warned against the use of autologous HSCT follow-  
39 ing HDCT, indicating the possibility of repositioning of malignant cells[38]. Others have ques-  
40 tioned the use of HDCT with reference to the potential existence of refractory cancer stem  
41 cells[9]. Pedrazzoli 2006 stated that the potential benefit of this treatment option has not been  
42 investigated sufficiently in comparative studies[39]. Kasper 2005 concluded that the use of  
43 HDCT for locally advanced or metastatic adult (soft tissue and bone) sarcomas still remains  
44 highly investigational and should not be performed outside clinical trials[40]. The identified  
45 RCT by Bui-Nguyen 2012 provides meaningful comparative data for the first time and its results  
46  
47  
48  
49  
50  
51  
52  
53  
54  
55  
56  
57  
58  
59  
60

1 *Subject: bmjopen-2014-005033.R1: Autologous HSCT following HDCT for NRSTS*

2  
3 questions any benefit of the intervention. Finally, we cannot close the chapter as it can be unse-  
4  
5 cure to rely on a single trial.  
6  
7  
8  
9  
10  
11  
12  
13  
14  
15  
16  
17  
18  
19  
20  
21  
22  
23  
24  
25  
26  
27  
28  
29  
30  
31  
32  
33  
34  
35  
36  
37  
38  
39  
40  
41  
42  
43  
44  
45  
46  
47  
48  
49  
50  
51  
52  
53  
54  
55  
56  
57  
58  
59  
60

For peer review only

1 *Subject: bmjopen-2014-005033.R1: Autologous HSCT following HDCT for NRSTS*

## 2 3 **Conclusion**

4  
5 Overall survival in patients with locally advanced or metastatic NRSTS was not statistically dif-  
6 ferent after autologous HSCT following HDCT compared to SDCT in a single RCT with a total  
7 of 83 patients. No other comparative study was available. A considerable number of patients  
8 were not evaluated concerning adverse events and its proportion among the transplanted patients  
9 remains unclear. If this treatment is offered it should only be after careful consideration and only  
10 within a randomised controlled trial.  
11  
12  
13  
14  
15  
16  
17  
18  
19  
20  
21  
22  
23  
24  
25  
26  
27  
28  
29  
30  
31  
32  
33  
34  
35  
36  
37  
38  
39  
40  
41  
42  
43  
44  
45  
46  
47  
48  
49  
50  
51  
52  
53  
54  
55  
56  
57  
58  
59  
60

1 *Subject: bmjopen-2014-005033.R1: Autologous HSCT following HDCT for NRSTS*

2  
3 **FOOTNOTES**

4  
5  
6 Acknowledgments: We thank the Cochrane Gynaecological Cancer Review Group for their as-  
7  
8 sistance during the preparation of the Cochrane Review. The National Institute for Health Re-  
9  
10 search (NIHR) is the largest single funder of the Cochrane Gynaecological Cancer Group. The  
11  
12 views and opinions expressed therein are those of the authors and do not necessarily reflect those  
13  
14 of the NIHR, NHS or the Department of Health.

15  
16  
17  
18 Ethics statement: An ethics statement was not required for this work.

19  
20  
21 Contributorship statement: FP created the search strategy, analysed the data and wrote the manu-  
22  
23 script. AML wrote the manuscript.

24  
25  
26  
27 Competing Interests: No authors have any competing interests.

28  
29  
30 Funding: Provision of fulltexts by the University of Cologne, Germany. No funding bodies had  
31  
32 any role in study design, data collection and analysis, decision to publish, or preparation of the  
33  
34 manuscript.

35  
36  
37 Data sharing statement: No additional data available.

1  
2  
3  
4  
5  
6  
7  
8  
9  
10  
11  
12  
13  
14  
15  
16  
17  
18  
19  
20  
21  
22  
23  
24  
25  
26  
27  
28  
29  
30  
31  
32  
33  
34  
35  
36  
37  
38  
39  
40  
41  
42  
43  
44  
45  
46  
47  
48  
49  
50  
51  
52  
53  
54  
55  
56  
57  
58  
59  
60

*Subject: bmjopen-2014-005033.R1: Autologous HSCT following HDCT for NRSTS*

## References

1. Weiss SW, Goldblum JR. *Enzinger and Weiss's soft tissue tumors*. St. Louis: Mosby, 2001.
2. Clark MA, Fisher C, Judson I, et al. Soft-tissue sarcomas in adults. *N Engl J Med* 2005;**353**(7):701-11
3. Sondak VK, Chang AE. Clinical evaluation and treatment of soft tissue tumors. In: Weiss SW, Goldblum JR, eds. *Enzinger and Weiss's soft tissue tumors*. St. Louis: Mosby, 2001:21-44.
4. Fletcher CDM, Bridge JA, Hogendoorn PCW, et al. *WHO Classification of Tumours of Soft Tissue and Bone*. Fourth ed. Lyon: International Agency for Research on Cancer (IARC), 2013.
5. ESMO / European Sarcoma Network Working Group. Soft tissue and visceral sarcomas: ESMO Clinical Practice Guidelines for diagnosis, treatment and follow-up. *Ann Oncol* 2012;**23**(Suppl 7):vii92-0
6. Casali PG, Blay JY. Soft tissue sarcomas: ESMO Clinical Recommendations for diagnosis, treatment and follow-up. *Ann Oncol* 2010;**21**(Suppl 5):v198–v203
7. Kotilingam D, Lev DC, Lazar AJ, et al. Staging soft tissue sarcoma: evolution and change. *CA Cancer J Clin* 2006;**56**(5):282-91
8. Riedel RF. Systemic therapy for advanced soft tissue sarcomas: highlighting novel therapies and treatment approaches. *Cancer* 2012;**118**(6):1474-85 doi: 10.1002/cncr.26415[published Online First: Epub Date]].
9. Banna GL, Simonelli M, Santoro A. High-dose chemotherapy followed by autologous hematopoietic stem-cell transplantation for the treatment of solid tumors in adults: a critical review. *Curr Stem Cell Res Ther* 2007;**2**(1):65-82
10. Peinemann F, Smith LA, Bartel C. Autologous hematopoietic stem cell transplantation following high dose chemotherapy for non-rhabdomyosarcoma soft tissue sarcomas. *Cochrane Database Syst Rev* 2013;**8**:CD008216 doi: 10.1002/14651858.CD008216.pub4[published Online First: Epub Date]].
11. Cochrane. The Cochrane Policy Manual [updated 14 April 2011]. Oxford: The Cochrane Collaboration, 2011.
12. Moher D, Liberati A, Tetzlaff J, et al. Preferred reporting items for systematic reviews and meta-analyses: the PRISMA statement. *PLoS Med* 2009;**6**:e1000097-e97
13. Fletcher CDM, Unni KK, Mertens F. *Pathology and genetics of tumours of soft tissue and bone*. Lyon: IARC Press, 2002.
14. NCI. Common Terminology Criteria for Adverse Events (CTCAE) and Common Toxicity Criteria (CTC). Secondary Common Terminology Criteria for Adverse Events (CTCAE) and Common Toxicity Criteria (CTC) 2009. [http://ctep.cancer.gov/protocolDevelopment/electronic\\_applications/ctc.htm](http://ctep.cancer.gov/protocolDevelopment/electronic_applications/ctc.htm).

1 *Subject: bmjopen-2014-005033.R1: Autologous HSCT following HDCT for NRSTS*

- 2  
3 15. EndNote [program]. New York City: Thomson Reuters, 2013.  
4  
5 16. National Library of Medicine (NLM). *ClinicalTrials.gov*. Bethesda: National Institutes of  
6 Health (NIH), 2013.  
7  
8 17. International Clinical Trials Registry Platform (ICTRP). *ICTRP Search Platform*. Geneva:  
9 WHO World Health Organization, 2013.  
10  
11 18. NCI. *NCI dictionary of cancer terms*. Bethesda: National Cancer Institute, 2014.  
12  
13 19. Higgins JPT, Altman DG, Sterne JAC. Table 8.5.a The Cochrane Collaboration's tool for  
14 assessing risk of bias. Chapter 8: Assessing risk of bias in included studies. In: Higgins  
15 JPT GS, ed. *Cochrane Handbook for Systematic Reviews of Interventions Version 510*  
16 [updated March 2011] The Cochrane Collaboration, 2011 Available from [www.cochrane-](http://www.cochrane-handbook.org)  
17 [handbook.org](http://www.cochrane-handbook.org). Chichester: John Wiley & Sons, Ltd, 2011.  
18  
19 20. Higgins JPT, Altman DG, Sterne JAC. Table 8.5.d Criteria for judging risk of bias in the  
20 'Risk of bias' assessment tool. Chapter 8: Assessing risk of bias in included studies. In:  
21 Higgins JPT GS, ed. *Cochrane Handbook for Systematic Reviews of Interventions*  
22 Version 510 [updated March 2011] The Cochrane Collaboration Available from  
23 [www.cochrane-](http://www.cochrane-handbook.org)  
24 [handbook.org](http://www.cochrane-handbook.org). Chichester: John Wiley & Sons, Ltd, 2011.  
25  
26 21. Bui-Nguyen B, Ray-Coquard I, Chevreau C, et al. High-dose chemotherapy consolidation for  
27 chemosensitive advanced soft tissue sarcoma patients: an open-label, randomized  
28 controlled trial. *Ann Oncol* 2012;**23**(3):777-84 doi: 10.1093/annonc/mdr282[published  
29 Online First: Epub Date]].  
30  
31 22. Bertuzzi A, Castagna L, Quagliuolo V, et al. Prospective study of high-dose chemotherapy  
32 and autologous peripheral stem cell transplantation in adult patients with advanced  
33 desmoplastic small round-cell tumour. *Br J Cancer* 2003;**89**(7):1159-61  
34  
35 23. Bisogno G, Ferrari A, Rosolen A, et al. Sequential intensified chemotherapy with stem cell  
36 rescue for children and adolescents with desmoplastic small round-cell tumor. *Bone*  
37 *Marrow Transplantation* 2010;**45**(5):907-11  
38  
39 24. Blay JY, Bouhour D, Ray-Coquard I, et al. High-dose chemotherapy with autologous  
40 hematopoietic stem-cell transplantation for advanced soft tissue sarcoma in adults.  
41 *Journal of Clinical Oncology* 2000;**18**(21):3643-50  
42  
43 25. Bokemeyer C, Franzke A, Hartmann JT, et al. A phase I/II study of sequential, dose-  
44 escalated, high dose ifosfamide plus doxorubicin with peripheral blood stem cell support  
45 for the treatment of patients with advanced soft tissue sarcomas. *Cancer*  
46 1997/10/1;**80**(7):1221-27  
47  
48 26. Cook RJ, Wang Z, Arora M, et al. Clinical outcomes of patients with desmoplastic small  
49 round cell tumor of the peritoneum undergoing autologous HCT: a CIBMTR  
50 retrospective analysis. *Bone Marrow Transplant* 2012;**47**(11):1455-8 doi:  
51 10.1038/bmt.2012.57[published Online First: Epub Date]].  
52  
53 27. Philippe-Chomette P, Kabbara N, Andre N, et al. Desmoplastic small round cell tumors with  
54 EWS-WT1 fusion transcript in children and young adults. *Pediatr Blood Cancer*  
55 2012;**58**(6):891-7 doi: 10.1002/pbc.23403[published Online First: Epub Date]].  
56  
57  
58  
59  
60



1 *Subject: bmjopen-2014-005033.R1: Autologous HSCT following HDCT for NRSTS*

- 2
- 3 28. Rosti G, Ferrante P, Ledermann J, et al. High-dose chemotherapy for solid tumors: results of  
4 the EBMT. *Crit Rev Oncol Hematol* 2002;**41**(2):129-40
- 5
- 6 29. Neglia JP, Friedman DL, Yasui Y, et al. Second malignant neoplasms in five-year survivors  
7 of childhood cancer: childhood cancer survivor study. *J Natl Cancer Inst* 2001;**93**(8):618-  
8 29
- 9
- 10 30. Baker KS, DeFor TE, Burns LJ, et al. New malignancies after blood or marrow stem-cell  
11 transplantation in children and adults: incidence and risk factors. *Journal of Clinical*  
12 *Oncology* 2003;**21**(7):1352-58
- 13
- 14 31. Fletcher CD. The evolving classification of soft tissue tumours - an update based on the new  
15 2013 WHO classification. *Histopathology* 2014;**64**(1):2-11 doi:  
16 10.1111/his.12267[published Online First: Epub Date]].
- 17
- 18 32. Doyle LA. Sarcoma classification: An update based on the 2013 World Health Organization  
19 Classification of Tumors of Soft Tissue and Bone. *Cancer* 2014;**120**(12):1763-74 doi:  
20 10.1002/cncr.28657[published Online First: Epub Date]].
- 21
- 22 33. Fletcher CD. Pleomorphic malignant fibrous histiocytoma: fact or fiction? A critical  
23 reappraisal based on 159 tumors diagnosed as pleomorphic sarcoma. *Am J Surg Pathol*  
24 1992;**16**(3):213-28
- 25
- 26 34. Matushansky I, Charytonowicz E, Mills J, et al. MFH classification: differentiating  
27 undifferentiated pleomorphic sarcoma in the 21st Century. *Expert Rev Anticancer Ther*  
28 2009;**9**(8):1135-44 doi: 10.1586/era.09.76[published Online First: Epub Date]].
- 29
- 30 35. Fletcher CD, Gustafson P, Rydholm A, et al. Clinicopathologic re-evaluation of 100  
31 malignant fibrous histiocytomas: prognostic relevance of subclassification. *J Clin Oncol*  
32 2001;**19**(12):3045-50
- 33
- 34 36. Kelleher FC, Viterbo A. Histologic and genetic advances in refining the diagnosis of  
35 "undifferentiated pleomorphic sarcoma". *Cancers* 2013;**5**(1):218-33 doi:  
36 10.3390/cancers5010218[published Online First: Epub Date]].
- 37
- 38 37. ACS. *Sarcoma: Adult Soft Tissue Cancer*. Atlanta: American Cancer Society, 2013.
- 39
- 40 38. Woods WG. Myeloablative therapy followed by stem cell rescue for pediatric solid tumors: a  
41 non-transplanter's perspective. *Cancer Research Therapy and Control* 1999;**9**(1-2):95-99
- 42
- 43 39. Pedrazzoli P, Ledermann JA, Lotz JP, et al. High dose chemotherapy with autologous  
44 hematopoietic stem cell support for solid tumors other than breast cancer in adults. *Ann*  
45 *Oncol* 2006;**17**(10):1479-88
- 46
- 47 40. Kasper B, Ho AD, Egerer G. Is there an indication for high-dose chemotherapy in the  
48 treatment of bone and soft-tissue sarcoma? *Oncology* 2005;**68**(2-3):115-21
- 49
- 50 41. Doros L, Kaste SC, Rodriguez-Galindo C. Sister Mary Joseph's nodule as presenting sign of  
51 a desmoplastic small round cell tumor. *Pediatric Blood and Cancer* 2008(2):388-90
- 52
- 53
- 54
- 55
- 56
- 57
- 58
- 59
- 60

1 *Subject: bmjopen-2014-005033.R1: Autologous HSCT following HDCT for NRSTS*

- 2
- 3 42. Engelhardt M, Zeiser R, Ihorst G, et al. High-dose chemotherapy and autologous peripheral  
4 blood stem cell transplantation in adult patients with high-risk or advanced Ewing and  
5 soft tissue sarcoma. *J Cancer Res Clin Oncol* 2007/1;**133**(1):1-11  
6
- 7 43. Kasper B, Dietrich S, Mechtersheimer G, et al. Large institutional experience with dose-  
8 intensive chemotherapy and stem cell support in the management of sarcoma patients.  
9 *Oncology* 2007;**73**(1-2):58-64  
10
- 11 44. Navid F, Santana VM, Billups CA, et al. Concomitant administration of vincristine,  
12 doxorubicin, cyclophosphamide, ifosfamide, and etoposide for high-risk sarcomas.  
13 *Cancer* 2006;**106**(8):1846-56  
14
- 15 45. Saab R, Khoury JD, Krasin M, et al. Desmoplastic small round cell tumor in childhood: the  
16 St. Jude Children's Research Hospital experience. *Pediatr Blood Cancer* 2007(3):274-79  
17
- 18 46. Slease RB, Benear JB, Selby GB, et al. High-dose combination alkylating agent therapy with  
19 autologous bone marrow rescue for refractory solid tumors. *J Clin Oncol* 1988;**6**(8):1314-  
20 20  
21  
22  
23  
24  
25  
26  
27  
28  
29  
30  
31  
32  
33  
34  
35  
36  
37  
38  
39  
40  
41  
42  
43  
44  
45  
46  
47  
48  
49  
50  
51  
52  
53  
54  
55  
56  
57  
58  
59  
60

1  
2  
3 *Subject: bmjopen-2014-005033.R1: Autologous HSCT following HDCT for NRSTS*  
4

5 **Tables**  
6  
7  
8  
9  
10  
11  
12  
13  
14  
15  
16  
17  
18  
19  
20  
21  
22  
23  
24  
25  
26  
27  
28  
29  
30  
31  
32  
33  
34  
35  
36  
37  
38  
39  
40  
41  
42

For peer review only

Subject: *bmjopen-2014-005033.R1: Autologous HSCT following HDCT for NRSTS*

**Table 1. Inclusion of malignant soft tissue tumours of the WHO classification 2013 versus 2012**

| Category                             | Malignant subtypes                                            | 2013 | 2002 | Inclusion |
|--------------------------------------|---------------------------------------------------------------|------|------|-----------|
| Adipocytic tumours                   |                                                               | 2013 | 2002 | Included  |
|                                      | Dedifferentiated liposarcoma                                  | 2013 | 2002 | Included  |
|                                      | Myxoid liposarcoma                                            | 2013 | 2002 | Included  |
|                                      | Pleomorphic liposarcoma                                       | 2013 | 2002 | Included  |
|                                      | Liposarcoma, not otherwise specified                          | 2013 | 2002 | Included  |
|                                      | Round cell liposarcoma                                        | No   | 2002 | Included  |
|                                      | Mixed-type liposarcoma                                        | No   | 2002 | Included  |
| Fibroblastic/Myofibroblastic tumours |                                                               | 2013 | 2002 | Included  |
|                                      | Adult fibrosarcoma                                            | 2013 | 2002 | Included  |
|                                      | Myxofibrosarcoma                                              | 2013 | 2002 | Included  |
|                                      | Low-grade fibromyxoid sarcoma                                 | 2013 | 2002 | Included  |
|                                      | Sclerosing epitheloid fibrosarcoma                            | 2013 | 2002 | Included  |
|                                      | Malignant haemangiopericytoma                                 | No   | No   | Included  |
|                                      |                                                               | 2013 | 2002 | Included  |
| So-called fibrohistiocytic tumours   |                                                               | 2013 | 2002 | Included  |
|                                      | Pleomorphic 'MFH'/ Undifferentiated pleomorphic sarcoma (UPS) | No   | 2002 | Included  |
|                                      | Giant cell 'MFH'/ UPS with giant cells                        | No   | 2002 | Included  |
|                                      | Inflammatory 'MFH'/ UPS with prominent inflammation           | No   | 2002 | Included  |
| Smooth muscle tumours                |                                                               | 2013 | 2002 | Included  |
|                                      | Leiomyosarcoma (excluding skin)                               | 2013 | 2002 | Included  |
| Pericytic (perivascular) tumours     |                                                               | 2013 | 2002 | No        |
| Skeletal muscle tumours              |                                                               | 2013 | 2002 | No        |
|                                      | Embryonal rhabdomyosarcoma                                    | 2013 | 2002 | No        |
|                                      | Alveolar rhabdomyosarcoma                                     | 2013 | 2002 | No        |
|                                      | Pleomorphic rhabdomyosarcoma                                  | 2013 | 2002 | No        |
|                                      | Spindle cell/sclerosing rhabdomyosarcoma                      | 2013 | No   | No        |
| Vascular tumours of soft tissue      |                                                               | 2013 | 2002 | Included  |
|                                      | Epithelioid haemangioendothelioma                             | 2013 | 2002 | Included  |
|                                      | Angiosarcoma of soft tissue                                   | 2013 | 2002 | Included  |
| Chondro-osseous tumours              |                                                               | 2013 | 2002 | No        |
|                                      | Mesenchymal chondrosarcoma                                    | 2013 | 2002 | No        |
|                                      | Extraskeletal osteosarcoma                                    | 2013 | 2002 | No        |

Subject: *bmjopen-2014-005033.R1: Autologous HSCT following HDCT for NRSTS*

| Category                              | Malignant subtypes                                           | 2013 | 2002 | Inclusion |
|---------------------------------------|--------------------------------------------------------------|------|------|-----------|
| Gastrointestinal stromal tumours      |                                                              | 2013 | No   | Included  |
|                                       | Gastrointestinal stromal tumour, malignant                   | 2013 | No   | Included  |
| Nerve sheath tumors                   |                                                              | 2013 | No   | Included  |
|                                       | Malignant peripheral nerve sheath tumour                     | 2013 | No   | Included  |
|                                       | Epithelioid malignant peripheral nerve sheath tumour         | 2013 | No   | Included  |
|                                       | Malignant Triton tumour                                      | 2013 | No   | Included  |
|                                       | Malignant granular cell tumour                               | 2013 | No   | Included  |
|                                       | Ectomesenchymoma                                             | 2013 | No   | Included  |
| Tumours of uncertain differentiation  |                                                              | 2013 | 2002 | Included  |
|                                       | Synovial sarcoma NOS                                         | 2013 | 2002 | Included  |
|                                       | Epithelioid sarcoma                                          | 2013 | 2002 | Included  |
|                                       | Alveolar soft-part sarcoma                                   | 2013 | 2002 | Included  |
|                                       | Clear cell sarcoma of soft tissue                            | 2013 | 2002 | Included  |
|                                       | Extraskeletal myxoid chondrosarcoma                          | 2013 | 2002 | No        |
|                                       | Extraskeletal Ewing sarcoma                                  | 2013 | 2002 | No        |
|                                       | Desmoplastic small round cell tumour                         | 2013 | 2002 | Included  |
|                                       | Extra-renal rhabdoid tumour                                  | 2013 | 2002 | Included  |
|                                       | Neoplasms with perivascular epithelioid cell differentiation | 2013 | 2002 | Included  |
|                                       | Intimal sarcoma                                              | 2013 | 2002 | Included  |
|                                       | Malignant Mesenchymoma                                       | No   | 2002 | Included  |
|                                       | Undifferentiated/ Unclassified sarcomas                      |      | 2013 | No        |
| Undifferentiated spindle cell sarcoma |                                                              | 2013 | No   | Included  |
| Undifferentiated pleomorphic sarcoma  |                                                              | 2013 | No   | Included  |
| Undifferentiated round cell sarcoma   |                                                              | 2013 | No   | Included  |
| Undifferentiated epithelioid sarcoma  |                                                              | 2013 | No   | Included  |
| Undifferentiated sarcoma NOS          |                                                              | 2013 | No   | Included  |

Abbreviation. MFH: malignant fibrous histiocytoma; NOS: not otherwise specified; UPS: undifferentiated pleomorphic sarcoma

Subject: *bmjopen-2014-005033.R1: Autologous HSCT following HDCT for NRSTS*

Table 2. Characteristics of studies and therapy

| Study                             | N. centers (country) | Enrollment; years | Prospective design | Autologous HSCT following HDCT |                                     |                         |
|-----------------------------------|----------------------|-------------------|--------------------|--------------------------------|-------------------------------------|-------------------------|
|                                   |                      |                   |                    | Drugs                          | Consolidation vs. salvage vs. NR; N | PBSCT vs. BMT vs. NR; N |
| <b>Aggregate comparative data</b> |                      |                   |                    |                                |                                     |                         |
| Bui-Nguyen 2012 [21]              | 16 (France)          | 2000 to 2008      | Yes                | Ca-Et-If                       | 38 vs. 0 vs. 0                      | 38 vs. 0 vs. 0          |
| <b>Aggregate case series data</b> |                      |                   |                    |                                |                                     |                         |
| Bertuzzi 2003 [22]                | 1 (Italy)            | 1997 to 2002      | Yes                | Me-Mi-Th                       | 10 vs. 0 vs. 0                      | 10 vs. 0 vs. 0          |
| Bisogno 2010 [23]                 | >1 (Italy)           | 1999 to 2008      | Yes                | Cy-Me-Th                       | 14 vs. 0 vs. 0                      | 14 vs. 0 vs. 0          |
| Blay 2000 [24]                    | 1 (France)           | 1988 to 1994      | Yes                | Ci-Et-If                       | 0 vs. 0 vs. 24                      | 0 vs. 0 vs. 24          |
| Bokemeyer 1997 [25]               | 3 (Germany)          | NR                | No                 | Do-If                          | 16 vs. 0 vs. 0                      | 16 vs. 0 vs. 0          |
| Cook 2012 [26]                    | 29 (USA)             | 1999 to 2007      | No                 | Ca-Cy-Et-Me-Th                 | 0 vs. 0 vs. 36                      | 33 vs. 2 vs. 1          |
| Philippe-Chomette 2012 [27]       | >1 (France)          | 1995 to 2006      | No                 | Various                        | 14 vs. 0 vs. 0                      | 0 vs. 0 vs. 14          |
| <b>Individual cases data</b>      |                      |                   |                    |                                |                                     |                         |
| 55 studies (142 patients)         | Various              | Various           | No                 | Various                        | 69 vs. 61 vs. 12                    | 102 vs. 21 vs. 19       |

Abbreviations: BMT: bone marrow transplant; Ca: carboplatin; Ci: cisplatin; Cy: cyclophosphamide; Do: Doxorubicin; Et: etoposide = Vepesid = VP 16; HDCT: high-dose chemotherapy; HSCT: autologous haematopoietic stem cell transplantation; If: ifosfamide; Me: melphalan; Mi: mitoxantrone; N: number; NR: information not reported in the article; PBSCT: peripheral blood stem cell transplant; Th: thiotepa; vs.: versus

Subject: *bmjopen-2014-005033.R1: Autologous HSCT following HDCT for NRSTS*

**Table 3. Characteristics of patients**

| Study                             | Patients analyzed; N |      | FU            | Subtypes | Age; median years (range) |               | Gender; % males |      |
|-----------------------------------|----------------------|------|---------------|----------|---------------------------|---------------|-----------------|------|
|                                   | HSCT                 | SDCT |               |          | HSCT                      | SDCT          | HSCT            | SDCT |
| <b>Aggregate comparative data</b> |                      |      |               |          |                           |               |                 |      |
| Bui-Nguyen 2012 [21]              | 38                   | 45   | 55 (NR)       | Various  | 46 (19 to 65)             | 43 (18 to 65) | 58              | 50   |
| <b>Aggregate case series data</b> |                      |      |               |          |                           |               |                 |      |
| Bertuzzi 2003 [22]                | 10                   | NA   | 35 (14 to 60) | DSRCT    | 29 (NR)                   | NA            | 100             | NA   |
| Bisogno 2010 [23]                 | 14                   | NA   | 27 (NR)       | DSRCT    | 10 (2 to 17)              | NA            | 93              | NA   |
| Blay 2000 [24]                    | 24                   | NA   | NR            | Various  | NR                        | NA            | NR              | NA   |
| Bokemeyer 1997 [25]               | 16                   | NA   | NR            | Various  | 45 (25 to 57)             | NA            | NR              | NA   |
| Cook 2012 [26]                    | 36                   | NA   | 44 (4 to 89)  | DSRCT    | 19 (8 to 46)              | NA            | 80              | NA   |
| Philippe-Chomette 2012 [27]       | 14                   | NA   | 23 (9 to 51)  | DSRCT    | NR (4 to 29)              | NA            | 86              | NA   |
| <b>Individual cases data</b>      |                      |      |               |          |                           |               |                 |      |
| 55 studies                        | 142                  | NA   | Various       | Various  | 25 (1 to 65)              | NA            | NR              | NA   |

Abbreviations: DSRCT: desmoplastic small-round cell tumor; FU: Follow-up of the analyzed patients in median months (range); HSCT: autologous haematopoietic stem cell transplantation following high-dose chemotherapy; N: number; NA: not applicable; NR: information not reported in the article; SDCT: standard-dose chemotherapy

Subject: *bmjopen-2014-005033.R1: Autologous HSCT following HDCT for NRSTS*

**Table 4. Frequency of subtypes**

| Subtype                                     | All | Aggregate | Individual |
|---------------------------------------------|-----|-----------|------------|
| Anaplastic sarcoma                          | 5   | 0         | 5          |
| Angiosarcoma                                | 10  | 4         | 6          |
| Clear cell sarcoma                          | 2   | 1         | 1          |
| Desmoplastic small round cell tumor         | 109 | 74        | 35         |
| Epitheloid sarcoma                          | 2   | 0         | 2          |
| Fibrosarcoma                                | 6   | 1         | 5          |
| Fibromyosarcoma                             | 1   | 0         | 1          |
| Leiomyosarcoma                              | 29  | 14        | 15         |
| Liposarcoma                                 | 15  | 8         | 7          |
| Mesenchymal sarcoma                         | 2   | 2         | 0          |
| Malignant fibrous histiocyoma               | 31  | 13        | 18         |
| Malignant haemangiopericytoma               | 8   | 5         | 3          |
| Malignant peripheral nerve sheath tumor     | 4   | 0         | 4          |
| Rhabdoid tumor, extra-renal, extra cerebral | 2   | 0         | 2          |
| Spindle cell sarcoma                        | 1   | 0         | 1          |
| Synovial sarcoma                            | 32  | 9         | 23         |
| Unclassified sarcoma                        | 17  | 12        | 5          |
| Undetermined sarcoma                        | 13  | 4         | 9          |
| Not NRSTS                                   | 5   | 5         | 0          |
| Total number                                | 294 | 152       | 142        |



1  
2  
3  
4  
5  
6  
7  
8  
9  
10  
11  
12  
13  
14  
15  
16  
17  
18  
19  
20  
21  
22  
23  
24  
25  
26  
27  
28  
29  
30  
31  
32  
33  
34  
35  
36  
37  
38  
39  
40  
41  
42  
43  
44  
45  
46  
47  
48  
49

Subject: *bmjopen-2014-005033.R1: Autologous HSCT following HDCT for NRSTS*

**Table 5. Overall survival in studies reporting aggregate data**

| Study                             | Overall survival (95% CI), point estimates |                 |                 | Statistics                                 |
|-----------------------------------|--------------------------------------------|-----------------|-----------------|--------------------------------------------|
|                                   | HSCT at 2 years                            | HSCT at 3 years | SDCT at 3 years |                                            |
| <b>Aggregate comparative data</b> |                                            |                 |                 |                                            |
| Bui-Nguyen 2012 [21]              |                                            | 32.7%           | 49.4%           | Hazard ratio 1.26 (0.70 to 2.29), P = 0.44 |
| <b>Aggregate case series data</b> |                                            |                 |                 |                                            |
| Bertuzzi 2003 [22]                | 20%                                        | NR              | NA              |                                            |
| Bisogno 2010 [23]                 | 48%                                        | 38.9%           | NA              |                                            |
| Blay 2000 [24]                    | NR                                         | NR              | NA              |                                            |
| Bokemeyer 1997 [25]               | Median 13 months, range 3 to 19            |                 | NA              |                                            |
| Cook 2012 [26]                    | NR                                         | 40% (24 to 58)  | NA              |                                            |
| Philippe-Chomette 2012 [27]       | 51.4% (23.2 to 79.6)                       | NR              | NA              |                                            |

Some estimates were deduced from Kaplan-Meier plots.  
Abbreviation. CI: confidence interval; HSCT: autologous haematopoietic stem cell transplantation following high-dose chemotherapy; NA: not applicable; NR: not reported; P: p-value; SDCT: standard-dose chemotherapy

1  
2  
3 *Subject: bmjopen-2014-005033.R1: Autologous HSCT following HDCT for NRSTS*

4  
5 **Table 6. Treatment-related mortality in the HSCT arm of all included studies**

6  
7

| Study                              | N affected / N evaluated patients | Specification                                                       |
|------------------------------------|-----------------------------------|---------------------------------------------------------------------|
| <b>Treatment-related mortality</b> |                                   |                                                                     |
| Bui-Nguyen 2012 [21]               | 1 / 38                            | Treatment-related leukemia death 2 years after HSCT                 |
| Cook 2012 [26]                     | 2 / 36                            | NR                                                                  |
| Doros 2008 [41]                    | 1 / 1                             | NR                                                                  |
| Engelhardt 2007 [42]               | 3 / 24                            | Sepsis (N = 2); pneumonia related to lung metastases (N = 1)        |
| Kasper 2007 [43]                   | 1 / 14                            | Cardiac arrest of unknown cause                                     |
| Matsuzaki 2002                     | 1 / 1                             | Multiple organ failure                                              |
| Navid 2006 [44]                    | 1 / 2                             | Liver as well as kidney failure                                     |
| Philippe-Chomette 2012 [27]        | 1 / 14                            | Died of treatment toxicity 12 months after HSCT                     |
| Saab 2007 [45]                     | 2 / 4                             | Acute myocardial infarction (N = 1); veno-occlusive disease (N = 1) |
| Sleasne 1988 [46]                  | 2 / 3                             | Progressive encephalopathy (N = 1); sepsis (N = 1)                  |
| Total                              | 15 / 137                          |                                                                     |

8  
9  
10  
11  
12  
13  
14  
15  
16  
17  
18  
19  
20  
21

22 Abbreviation. HSCT: autologous haematopoietic stem cell transplantation following high-dose chemotherapy; N: number; NR: not reported

23  
24  
25  
26  
27  
28  
29  
30  
31  
32  
33  
34  
35  
36  
37  
38  
39  
40  
41  
42

Subject: *bmjopen-2014-005033.R1: Autologous HSCT following HDCT for NRSTS*

**Table 7. Grade 3 to 4 NCI-CTCAE non-haematological toxicity in the HSCT arm of studies reporting aggregate case series data**

| Study                             | N events / N evaluated patients | Specification                                                                                                  |
|-----------------------------------|---------------------------------|----------------------------------------------------------------------------------------------------------------|
| <b>Aggregate comparative data</b> |                                 |                                                                                                                |
| Bui-Nguyen 2012 [21]              | 11 / 38                         | Digestive (N = 8); infection (N = 2); pain (N = 1)                                                             |
| <b>Aggregate case series data</b> |                                 |                                                                                                                |
| Bertuzzi 2003 [22]                | NR                              | NA                                                                                                             |
| Bisogno 2010 [23]                 | 1 / 14                          | Mucositis grade 4                                                                                              |
| Blay 2000 [24]                    | 16 / 24                         | Neurologic grade 4 (N = 1); lung grade 3/4 (N = 2); renal grade 3/4 (N = 5); nausea/vomiting grade 3/4 (N = 8) |
| Bokemeyer 1997 [25]               | 8 / 16                          | No grade 4; neurologic (N = 1); renal (N = 2); infection (N = 1); mucositis (N = 2); nausea/emesis (N = 2)     |
| Cook 2012 [26]                    | NR                              | NA                                                                                                             |
| Philippe-Chomette 2012 [27]       | NR                              | NA                                                                                                             |

Abbreviation. HSCT: autologous haematopoietic stem cell transplantation following high-dose chemotherapy; N: number; NA: not applicable; NR: not reported; NCI-CTCAE: National Cancer Institute (NCI) Common Terminology Criteria for Adverse Events (CTCAE) grade III to IV[14]

1  
2  
3  
4  
5  
6  
7  
8  
9  
10  
11  
12  
13  
14  
15  
16  
17  
18  
19  
20  
21  
22  
23  
24  
25  
26  
27  
28  
29  
30  
31  
32  
33  
34  
35  
36  
37  
38  
39  
40  
41  
42  
43  
44  
45  
46  
47  
48  
49

1  
2  
3 *Subject: bmjopen-2014-005033.R1: Autologous HSCT following HDCT for NRSTS*  
4

## 5 **Figure legends**

6

7 **Figure 1. Literature search and study flow.**  
8  
9  
10  
11  
12  
13  
14  
15  
16  
17  
18  
19  
20  
21  
22  
23  
24  
25  
26  
27  
28  
29  
30  
31  
32  
33  
34  
35  
36  
37  
38  
39  
40  
41  
42

For peer review only

*Subject: bmjopen-2014-005033.R1: Autologous HSCT following HDCT for NRSTS*

1  
2  
3  
4  
5  
6  
7  
8  
9  
10  
11  
12  
13  
14  
15  
16  
17  
18  
19  
20  
21  
22  
23  
24  
25  
26  
27  
28  
29  
30  
31  
32  
33  
34  
35  
36  
37  
38  
39  
40  
41  
42  
43  
44  
45  
46  
47  
48  
49  
50  
51  
52  
53  
54  
55  
56  
57  
58  
59  
60

For peer review only

1 | *Subject: bmjopen-2014-005033*.[RI](#): Autologous HSCT following HDCT for NRSTS

2  
3 **Autologous haematopoietic stem cell transplantation following high-dose chemotherapy for**  
4 **non-rhabdomyosarcoma soft tissue sarcomas – a Cochrane Systematic Review\***  
5

6  
7 Frank Peinemann,<sup>1†</sup> Alexander M. Labeit,<sup>2</sup>

8  
9 <sup>1</sup>Children's Hospital, University of Cologne, Cologne, Germany

10  
11 <sup>2</sup>Center for Outcomes Research, University of Illinois College of Medicine at Peoria, Illinois,  
12  
13 USA

14  
15  
16 \*This article is based on a Cochrane Systematic Review published in the Cochrane Database of  
17 Systematic Reviews (CDSR) 2013, Issue 8. Art. No.: CD008216. DOI:

18  
19 10.1002/14651858.CD008216.pub4. (see [www.thecochranelibrary.com](http://www.thecochranelibrary.com) for information).

20  
21 Cochrane Systematic Reviews are regularly updated as new evidence emerges and in response to  
22 feedback, and the CDSR should be consulted for the most recent version of the review.  
23

24  
25  
26 †Corresponding author: Frank Peinemann, M.D., M.Sc., Children's Hospital, University of Co-  
27 logne, Kerpener Str. 62, 50937 Cologne, Germany. E-mail: [pubmedprjournal@gmail.com](mailto:pubmedprjournal@gmail.com).

28  
29 Phone: +49 (176) 31130745. Fax: +49 (221) 356851.  
30

31  
32  
33 E-mail addresses:

34  
35 FP: [pubmedprjournal@gmail.com](mailto:pubmedprjournal@gmail.com)

36  
37 AL: [alabeit.publications@gmail.com](mailto:alabeit.publications@gmail.com)  
38  
39  
40  
41  
42  
43  
44  
45  
46  
47  
48  
49  
50  
51  
52  
53  
54  
55  
56  
57  
58  
59  
60

1 | *Subject: bmjopen-2014-005033.R1: Autologous HSCT following HDCT for NRSTS*

## 2 |

## 3 |

## 4 | **Abstract**

## 5 |

6 |

7 | Objectives: We conducted a systematic review to compare the efficacy and adverse events of

8 | autologous haematopoietic stem cell transplantation (HSCT) following high-dose chemotherapy

9 | (HDCT) versus standard-dose chemotherapy (SDCT) in patients with locally advanced or meta-

10 | static non-rhabdomyosarcoma soft tissue sarcomas (NRSTS).

11 |

12 | Setting: Patients were observed in hospital units specialised for cancer therapy, ~~and stem cell~~

13 | transplantation (tertiary level of care). There were no limits on the geographical location.

14 |

15 | Participants: The review evaluated 294 patients with 19 different subtypes of malignant NRSTS.

16 | according to the World Health Organization 2013 classification. We excluded Ewing family of

17 | tumours. The patients had a median age between 10 and 46 years of age (range 2 to 65) and

18 | were mostly males.

19 |

20 | Primary and secondary outcome measure: The planned and measured primary outcomes were

21 | overall survival and treatment-related mortality. The planned and measured secondary outcomes

22 | were progression-free survival, grade 3 to 4 non-haematological toxicity, and secondary neo-

23 | plasia. Other secondary outcomes including disease-free survival, event-free survival, and

24 | health-related quality of life were not reported.

25 |

26 | Results: We included 62 studies reporting on 294 transplanted patients. We identified one ran-

27 | domised controlled trial (RCT) with 38 transplanted and 45 non-transplanted patients and judged a

28 | low risk of bias. We further identified 61 single-arm studies with 256 transplanted patients.

29 | Overall survival in the RCT was reported not statistically significantly different between autolo-

30 | gous HSCT following HDCT versus SDCT. The hazard ratio was 1.26 (95% confidence interval

31 | 0.70 to 2.29; P = 0.44) and the point estimates at three years were 32.7% versus 49.4%. Data

1 | *Subject: bmjopen-2014-005033*.[RI](#): Autologous HSCT following HDCT for NRSTS

2  
3 from single-arm studies were used to extract data on adverse events. Treatment-related mortality  
4  
5 was reported in 5.1% (15 of 294) transplanted patients.  
6  
7

8 Conclusion: Overall survival in patients with locally advanced or metastatic NRSTS was not  
9  
10 statistically different after autologous HSCT following HDCT compared to SDCT in a single  
11

12 RCT with a total of 83 patients. No other comparative study was available. ~~A considerable num-~~  
13 ~~ber of patients were not evaluated concerning adverse events and~~ the proportion of adverse  
14 events among the transplanted patients ~~remains is not clear~~unclear.  
15  
16  
17  
18  
19  
20  
21  
22  
23  
24  
25  
26  
27  
28  
29  
30  
31  
32  
33  
34  
35  
36  
37  
38  
39  
40  
41  
42  
43  
44  
45  
46  
47  
48  
49  
50  
51  
52  
53  
54  
55  
56  
57  
58  
59  
60



| *Subject: bmjopen-2014-005033*.[RI](#): Autologous HSCT following HDCT for NRSTS

## Keywords

Systematic review, soft tissue sarcomas, high-dose chemotherapy, autologous haematopoietic stem cell transplantation

## Strengths and limitations of this study

- We conducted a comprehensive literature search and strictly adhered to the projected methodology.
- The WHO classification of soft tissue sarcomas was adopted and modified to define a clear terminology for the study selection process.
- We judged a low risk of bias for the single identified RCT, which may serve as the major relevant evidence.
- Single-arm studies provided some estimation about serious adverse events with transplantation
- Some treatments were performed 10 to 20 years ago. Thus, the results may not be applicable to patients who are treated today.
- The included studies report various subtypes of non-rhabdomyosarcoma soft tissue sarcomas and each tumor type may carry an individual risk profile and, therefore, ideally should be evaluated separately.

1  
2  
3  
4  
5  
6  
7  
8  
9  
10  
11  
12  
13  
14  
15  
16  
17  
18  
19  
20  
21  
22  
23  
24  
25  
26  
27  
28  
29  
30  
31  
32  
33  
34  
35  
36  
37  
38  
39  
40  
41  
42  
43  
44  
45  
46  
47  
48  
49  
50  
51  
52  
53  
54  
55  
56  
57  
58  
59  
60

| Subject: *bmjopen-2014-005033*.[RI](#): Autologous HSCT following HDCT for NRSTS

| <u>Abbreviation</u>   | <u>Term</u>                                               |
|-----------------------|-----------------------------------------------------------|
| <a href="#">HDCT</a>  | <a href="#">High-dose chemotherapy</a>                    |
| <a href="#">HSCT</a>  | <a href="#">Haematopoietic stem cell transplantation</a>  |
| <a href="#">MFH</a>   | <a href="#">Malignant Fibrous Histiocytoma</a>            |
| <a href="#">NRSTS</a> | <a href="#">Non-rhabdomyosarcoma soft tissue sarcomas</a> |
| <a href="#">RCT</a>   | <a href="#">Randomised controlled trial</a>               |
| <a href="#">SDCT</a>  | <a href="#">Standard-dose chemotherapy</a>                |

| *Subject: bmjopen-2014-005033.R1: Autologous HSCT following HDCT for NRSTS*

## Introduction

Soft tissue sarcomas (STS) are a highly heterogeneous group of rare malignant solid tumors of non-epithelial extraskelatal body tissue and are classified on a histogenetic basis[1]. The location of the primary tumor can involve any area of the body[2]. STS can involve any type of tissue and typically affect muscles, tendons, adipose tissue, blood vessels and joints and commonly present as a painless mass[3]. In this review we investigated non-rhabdomyosarcoma soft tissue sarcomas (NRSTS) provided that they are categorized as malignant according to the World Health Organization (WHO) 2002 classification[4]. In Western countries about four new cases of NRSTS are estimated per 100,000 population every year, with the Ewing family of tumors excluded from this statistic [5].

Surgery is the standard treatment for localized NRSTS and can be curative if distant dissemination is not present[6 7]. Chemotherapy is regarded mainly as a palliative treatment for high-risk patients who are characterized by inoperable, locally advanced and metastatic disease[6]. Riedel 2012 provides an overview of current systemic therapies and discusses possible novel therapeutic agents and treatment strategies[8]. High-dose chemotherapy (HDCT) has been evaluated as an alternative treatment option for high-risk patients. The rationale for HDCT is that escalating doses of HDCT may increase survival by capturing putatively remnant malignant cells[9]. The rationale for autologous haematopoietic stem cell transplantation (HSCT) following HDCT is a planned rescue for HDCT-related severe haematologic toxicity[9]. The primary objective of the present systematic review is to evaluate effectiveness and adverse events of autologous HSCT following HDCT in patients with advanced or metastatic NRSTS.

1 | *Subject: bmjopen-2014-005033*.[RI](#): Autologous HSCT following HDCT for NRSTS

## 2 | **Methods**

3 | This article is based on a Cochrane Systematic Review published in The Cochrane Library[10].  
4 |  
5 | Publication of this work is in agreement with the policy of The Cochrane Collaboration[11].  
6 |  
7 | While preparing this systematic review, we endorsed the PRISMA statement, adhered to its prin-  
8 | ciples and conformed to its checklist[12].  
9 |

### 10 | **Study inclusion criteria**

11 | We included patients with NRSTS provided that they are categorized as malignant according to  
12 | the World Health Organization (WHO) [2002–2013](#) classification [on soft tissue sarcomas](#)[4] [as](#)  
13 | [well as malignant haemangiopericytoma and anaplastic sarcoma](#). We excluded the Ewing family  
14 | of tumors (~~EFT~~) according to the European Society for Medical Oncology (ESMO) Guidelines  
15 | Working Group[5], [chondrosarcomas, osteosarcomas, and rhabdomyosarcomas](#). While writing  
16 | the Cochrane Review, we referred to the WHO 2002 classification [13]. For the purpose of the  
17 | present [study systematic review](#), we updated the inclusion criteria and re-evaluated the potentially  
18 | relevant studies and included the following entities: 'Gastrointestinal Stromal Tumours' (~~GIST~~),  
19 | 'Malignant peripheral nerve sheath tumor' (~~MPNST~~), 'Undifferentiated pleomorphic sarcoma not  
20 | otherwise specified' (~~UPS-NOS~~). Almost all published studies refer to the 2002 classification.  
21 | Thus, we continued to include the following entities, though, they were removed and relocated  
22 | within the 2013 classification: 'malignant fibrous histiocytoma' (MFH), 'undifferentiated sar-  
23 | coma' (~~UDS~~), 'unclassified sarcoma' (~~UCS~~), and 'haemangiopericytoma' (~~HPC~~). [Table 1 com-](#)  
24 | [pares the categories and malignant subtypes of the 2013 versus the 2002 edition of the WHO](#)  
25 | [classification of tumours of soft tissue and indicates which of those are included in the present](#)  
26 | [systematic review](#). Participants were included regardless of age, severity, and clinical stage of  
27 | disease. Studies were included as long as at least 80% of patients had NRSTS and received the  
28 | test intervention. The test intervention was autologous HSCT following HDCT containing stem  
29 | cells from peripheral blood or bone marrow. The comparator was standard-dose chemotherapy.  
30 |

1 | *Subject: bmjopen-2014-005033* [.RI](#): Autologous HSCT following HDCT for NRSTS

2  
3 The primary outcomes were overall survival and treatment-related mortality. Secondary out-  
4  
5 comes were disease-free survival, progression-free survival, event-free survival, non-  
6  
7 haematological toxicity grades 3 to 4[14], secondary malignant neoplasia, and health-related  
8  
9 quality of life ~~(HRQL)~~.

### 12 | **Search strategy, selection of studies, and data extraction**

14 We conducted an electronic literature database search in MEDLINE (Ovid), EMBASE (Ovid),  
15  
16 and Cochrane Library CENTRAL (Wiley) including articles published from inception to an up-  
17  
18 date search on 12 June 2014. The corresponding search strategies have been published in the  
19  
20 corresponding Cochrane Review [10]. We retrieved all titles and abstracts by electronic search-  
21  
22 ing and downloaded them to the reference management database EndNote Version X3[15]. We  
23  
24 considered studies written in languages other than English. We searched the online registries[16  
25  
26 17] on 12 June 2014 for additional completed or ongoing studies using the search strategy "sar-  
27  
28 coma AND chemotherapy AND transplantation". We searched all retrieved abstracts of annual  
29  
30 meetings contained in EMBASE (Ovid). We contacted authors to replenish missing information.  
31  
32 All data assessments were performed independently by two independent review authors. We re-  
33  
34 solved differences by discussion or by appeal to a third review author. We judged whether the  
35  
36 autologous HSCT following HDCT could be regarded as a consolidation or a salvage therapy. A  
37  
38 consolidation therapy is a treatment that is given after cancer has disappeared following the ini-  
39  
40 tial therapy and a salvage therapy is a treatment that is given after the cancer has not responded  
41  
42 to other treatments[18]. We considered a consolidation therapy if the status at transplantation  
43  
44 was either a complete or a partial response to the preceding therapy and we considered a salvage  
45  
46 therapy if the status was less favourable and in case a relapse was described.  
47  
48  
49  
50  
51  
52  
53  
54  
55  
56  
57  
58  
59  
60

1 | *Subject: bmjopen-2014-005033*.[RI](#): Autologous HSCT following HDCT for NRSTS

### 2 3 **Assessment of risk of bias in included studies**

4  
5 We have used four criteria from The Cochrane Collaboration's tool for assessing risk of bias in  
6  
7 randomised controlled trials (RCTs)[19]: random sequence generation, allocation concealment,  
8  
9 blinding of outcome assessment, and selective reporting such as not reporting pre-specified out-  
10  
11 comes. We extended the Cochrane tool for assessing risk of bias by five criteria that consider  
12  
13 nonrandomised studies: prospective design, comparable baseline characteristics, assignment of  
14  
15 patients to treatment groups, concurrent control, and loss to follow-up. We applied The Cochrane  
16  
17 Collaboration's criteria for judging risk of bias[20].  
18  
19

### 20 21 **Data synthesis**

22  
23 We synthesized aggregate data as narrative because data were too scarce to be pooled. In  
24  
25 difference to the Cochrane Review, we did not pool time-to-event data on overall survival from  
26  
27 studies with individual data. With respect to survival data, we accepted time of diagnosis and  
28  
29 beginning of treatment as starting points. We evaluated all 62 studies to search for reports on  
30  
31 treatment-related mortality and tabulated the identified patient data. We evaluated the 7 studies  
32  
33 reporting aggregate data to search for reports on grade 3 to 4 non-haematological toxicity in the  
34  
35 autologous HSCT following HDCT arm and tabulated the identified event data.  
36  
37  
38  
39  
40  
41  
42  
43  
44  
45  
46  
47  
48  
49  
50  
51  
52  
53  
54  
55  
56  
57  
58  
59  
60

| *Subject: bmjopen-2014-005033*.[RI](#): Autologous HSCT following HDCT for NRSTS

## Results

### Search results

**Figure 1** shows the literature search and study flow. We retrieved 1035 records and evaluated 260 fulltext papers in detail. We included 62 studies with 294 transplanted patients, one RCT with 38 transplanted and 45 non-transplanted patients[21], six single-arm studies reporting aggregate case series data[22-27], and 55 single-arm studies with individual data. In online registries, we identified six studies with a still pending completion and we did not find additional studies in the update search.

### Baseline data

We provide an overview of the main characteristics of studies and treatment (**Table 2**), of the patients (**Table 3**), and of the frequency of the identified subtypes (**Table 4**). The one RCT was an open, multicenter, randomised phase III study with two parallel treatment groups[21]. Patients were eligible for randomisation if they had responded to chemotherapy or, for stable disease, if a complete surgical resection of all disease sites could be carried out. The intention-to-treat principle was modified to exclude patients found to be ineligible at a histological review after randomisation. Three of the six single-arm studies reporting aggregate case series data collected the data prospectively[22-24] and three retrospectively[25-27]. Data from the remaining 55 single-arm studies were considered for the description of treatment-related mortality only.

The 62 studies were set in 13 different countries in four different continents. Most of the transplanted patients were studied in France, the United States, and Germany. We assume that most patients in the studies reporting aggregate case series data received autologous HSCT following HDCT as a consolidation therapy, whereas a considerable number of the individual case data were associated with autologous HSCT following HDCT as a rescue therapy. The majority of all studies used peripheral blood stem cell transplants. Median age varied roughly between 19 and

1 | *Subject: bmjopen-2014-005033*.[RI](#): Autologous HSCT following HDCT for NRSTS

2  
3 46 years and there was a male preponderance. Patients had 19 different relevant histological di-  
4  
5 diagnoses. Most patients had desmoplastic small round-cell tumor (N = 109 of 294) followed by  
6  
7 the new category of undifferentiated pleomorphic sarcomas (N = 61), which is composed of ~~ma-~~  
8  
9 ~~ignant fibrous histiocytoma~~MFH (N = 31), unclassified sarcoma (N = 17), and undetermined  
10  
11 sarcoma (N = 13).  
12  
13

### 14 **Primary outcome**

15  
16 Overall survival was not statistically significantly different in the RCT by Bui-Nguyen 2012 be-  
17  
18 tween autologous HSCT following HDCT versus SDCT regarding the hazard ratio of 1.26 (95%  
19  
20 CI 0.70 to 2.29; P = 0.44)[21] (**Table 5**). In this RCT, the point estimates at three years were  
21  
22 32.7% versus 49.4% based on 8 versus 17 remaining patients at risk. The patients at risk at base-  
23  
24 line were 38 versus 45 patients. With respect to the studies reporting aggregate case series data,  
25  
26 overall survival for transplanted patients ranged roughly from 20% to 51% at 2 years and from  
27  
28 32% to 40% at three years (**Table 5**). In 10 studies, treatment-related mortality (TRM) was asso-  
29  
30 ciated with 15 of 137 evaluated patients (**Table 6**). Assuming no other TRM in the rest of 157  
31  
32 patients, a risk for procedure-related death might be estimated as 5.1% (15 of 294).  
33  
34  
35  
36  
37

### 38 **Secondary outcomes**

39  
40 Progression-free survival was also not statistically significantly different in the RCT by Bui-  
41  
42 Nguyen 2012 between autologous HSCT following HDCT versus SDCT regarding the hazard  
43  
44 ratio of 1.34(95% CI 0.81 to 2.20; P = 0.25)[21]. In this RCT, the point estimates at three years  
45  
46 were 9.3% versus 21.6% based on 3 versus 12 remaining patients at risk. The RCT did not report  
47  
48 results on disease-free survival and event-free survival. An overview of the number of events of  
49  
50 non-haematological toxicity grade 3 to 4 is provided in **Table 7**. In the RCT, 11 events were ob-  
51  
52 served in 38 transplanted patients and 1 event (asthenia) was reported regarding the standard-  
53  
54 dose chemotherapy arm. In 3 of the studies reporting aggregate case series data, 25 events were  
55  
56  
57  
58  
59  
60



1 | *Subject: bmjopen-2014-005033*.[RI](#): Autologous HSCT following HDCT for NRSTS

2  
3 observed in 54 transplanted patients in the HSCT arm. The other 3 studies did not report toxicity  
4  
5 data. We identified one secondary neoplasia in a single case report. Health-related quality of life  
6  
7 scales were not addressed in the included studies.  
8  
9

### 10 **Data quality**

11  
12 Clinical heterogeneity was substantial because tumor subdiagnosis varied considerable between  
13  
14 patients. Furthermore, tumor stage and metastasis was not reported for all participants. The RCT  
15  
16 by Bui-Nguyen 2012[21] stands out as it is the only study reporting comparative data. We  
17  
18 judged a low risk of bias for this trial for random sequence generation and selective reporting.  
19  
20 However, the trial does have some drawbacks. We judged an unclear risk for allocation con-  
21  
22 cealment because masking of allocation was not described in full detail. We judged a high risk of  
23  
24 bias for blinding of outcome assessment because it was not reported for any outcome. The other  
25  
26 61 of 62 studies are single-arm studies and are therefore not qualified for assessing a treatment  
27  
28 effect.  
29  
30  
31  
32  
33  
34  
35  
36  
37  
38  
39  
40  
41  
42  
43  
44  
45  
46  
47  
48  
49  
50  
51  
52  
53  
54  
55  
56  
57  
58  
59  
60

1 | *Subject: bmjopen-2014-005033*.[RI](#): Autologous HSCT following HDCT for NRSTS

## 2 | **Discussion**

### 3 | **Outcomes**

4 | We identified one randomised controlled trial comparing autologous HSCT following HDCT  
5 | versus SDCT[21]. The authors reported a difference in overall survival and progression-free sur-  
6 | vival after the treatment in favour of SDCT but the difference was not statistically significant,  
7 | respectively. Therefore, there is evidence that patients may not have a better survival after autol-  
8 | ogous HSCT following HDCT versus SDCT. If at all, this intervention should only be offered  
9 | after careful consideration and preferably only within a randomised controlled clinical trial. We  
10 | estimated a treatment-related mortality of 5.1%, which was somewhat higher than 2.0% reported  
11 | by others[28]. Severe toxicity grade 3 to 4 was sparsely reported. Studies on health-related quali-  
12 | ty of life were not identified. The frequency of secondary neoplasia in 1 of 294 participants is  
13 | probably an extreme underestimation of the true frequency due to a relatively short follow-up.  
14 | The detection of secondary neoplasia depends on a long follow-up and was estimated from 4.0%  
15 | to 6.9% by others[29 30].

### 16 | **The WHO 2013 classification**

17 | The ~~World Health Organization~~ (WHO) recently published the 2013 classification on soft tissue  
18 | sarcomas[4]. The authors inserted the category 'Undifferentiated Pleomorphic Sarcoma Not Oth-  
19 | erwise Specified' to lodge those types of soft tissue sarcomas that are difficult to classify using  
20 | the current available techniques[31 32]. The authors integrated the terms '~~MFH~~Malignant Fi-  
21 | brous Histiocytoma', 'Undifferentiated Sarcoma', and 'Unclassified Sarcoma' into this newly cre-  
22 | ated category. ~~Malignant fibrous histiocytoma~~ (MFH) was characterized by a apparent lack of  
23 | specific differentiation[33] and it was considered a diagnosis of exclusion[34]. MFH was regard-  
24 | ed as the most common soft tissue sarcoma of adulthood[33] and accounted for up to 25% of  
25 | patients in clinical trials on soft tissue sarcoma[34]. In 1992, Fletcher et al. reassessed 159 cases  
26 | with MFH and found 63% (97 of 159) tumors to be specific sarcomas other than MFH[33]. In  
27 |

1 | *Subject: bmjopen-2014-005033*.[RI](#): Autologous HSCT following HDCT for NRSTS

2  
3 2001, Fletcher et al. confirmed that 84% (84 of 100) tumors of patients with MFH showed suffi-  
4  
5 cient differentiation to assign them to specific subtypes of soft tissue sarcomas[35]. The tech-  
6  
7 niques to assess cell differentiation have been substantially improved with the effect that the fre-  
8  
9 quency of the tumor within this category has decreased[36]. It was supposed that the category of  
10  
11 ['Undifferentiated Sarcoma – Otherwise Not Specified'](#)~~UPS-NOS~~ may contain liposarcoma, fibro-  
12  
13 sarcoma, leiomyosarcoma, rhabdomyosarcoma, other sarcomas, and even carcinomas or lym-  
14  
15 phomas[36 37]. It was estimated that pathologist might have difficulties to identify a specific  
16  
17 differentiation in 10% to15% of tumors previously called MFH[37]. The new edition also re-  
18  
19 moved the term 'Haemangiopericytoma'[31 32]. 'Gastrointestinal Stromal tumours' and 'Nerve  
20  
21 Sheath tumours' were relocated from other classifications and appear for the first time in the soft  
22  
23 tissue classifications[31 32]. Consequently, the term 'Malignant Peripheral Nerve Sheath Tumor'  
24  
25 is newly integrated.  
26  
27  
28  
29

### 30 **Strengths and limitations**

31  
32 The search strategy was broad to aim for the retrieval of all relevant studies. With respect to his-  
33  
34 torical versions of the Cochrane Review[10], we applied two different search strategies and re-  
35  
36 trieved the same studies with aggregate data but different studies with individual cases data. This  
37  
38 results show the substantial difficulty associated with the aim of searching for all published case.  
39  
40 This enterprise appears almost impossible. We adopted the new WHO 2013 classification of soft  
41  
42 tissue sarcomas and exerted minor modifications to define a clear terminology for the study selec-  
43  
44 tion process. The group of NRSTS consists of many subtypes that are difficult to diagnose and  
45  
46 separate even today. A considerable number of tumors cannot clearly assigned to a specific his-  
47  
48 tologic category. Thus, we may have tumors with a specific label that might not be true. Other-  
49  
50 wise, we may have tumors without a specific label that might belong to a specific category. We  
51  
52 excluded studies if the proportion of non-eligible participants were greater or equal to 20% of the  
53  
54 total population to prevent considerable mixture with disease or interventions that are not includ-  
55  
56  
57  
58  
59  
60

1 | *Subject: bmjopen-2014-005033*.[RI](#): Autologous HSCT following HDCT for NRSTS

2  
3 ed in the present review. Authors were contacted to ask for additional data. We judged a low risk  
4  
5 of bias for the one identified RCT, which may serve as the major relevant evidence. All other  
6  
7 identified studies were single-arm studies that are not helpful to decide whether autologous  
8  
9 HSCT following HDCT for NRSTS is a meaningful treatment option. Therefore, we removed  
10  
11 survival data of studies reporting individual data. Nevertheless, they provided data for estimation  
12  
13 about treatment-related mortality within all included transplanted patients. We also removed  
14  
15 data on non-haematological toxicity of studies reporting individual data because the sparse re-  
16  
17 porting might have caused a display of not representative information. The description of consol-  
18  
19 idation and salvage therapy is based on our judgement and might be judged different by others.  
20  
21 These types of therapy were not precisely reported in most studies. Some treatments were per-  
22  
23 formed 10 to 20 years ago. Thus, the results may not be applicable to patients who are treated  
24  
25 today. All studies report various subtypes of NRSTS and each tumor type may carry an individu-  
26  
27 al risk profile and, therefore, ideally should be evaluated separately. With respect to the individ-  
28  
29 ual survival data, follow-up started at different time points, that is, at diagnosis or at start of  
30  
31 treatment. The delay between diagnosis and starting high-dose chemotherapy can be considera-  
32  
33 ble.  
34  
35  
36  
37  
38

### 39 **Other findings and opinions**

40  
41 We want to point out that some authors have warned against the use of autologous HSCT follow-  
42  
43 ing HDCT, indicating the possibility of repositioning of malignant cells[38]. Others have ques-  
44  
45 tioned the use of HDCT with reference to the potential existence of refractory cancer stem  
46  
47 cells[9]. Pedrazzoli 2006 stated that the potential benefit of this treatment option has not been  
48  
49 investigated sufficiently in comparative studies[39]. Kasper 2005 concluded that the use of  
50  
51 HDCT for locally advanced or metastatic adult (soft tissue and bone) sarcomas still remains  
52  
53 highly investigational and should not be performed outside clinical trials[40]. The identified  
54  
55 RCT by Bui-Nguyen 2012 provides meaningful comparative data for the first time and its results  
56  
57  
58  
59  
60

1 | *Subject: bmjopen-2014-005033*.[RI](#): Autologous HSCT following HDCT for NRSTS

2  
3 questions any benefit of the intervention. Finally, we cannot close the chapter as it can be unse-  
4  
5 cure to rely on a single trial.  
6  
7  
8  
9  
10  
11  
12  
13  
14  
15  
16  
17  
18  
19  
20  
21  
22  
23  
24  
25  
26  
27  
28  
29  
30  
31  
32  
33  
34  
35  
36  
37  
38  
39  
40  
41  
42  
43  
44  
45  
46  
47  
48  
49  
50  
51  
52  
53  
54  
55  
56  
57  
58  
59  
60

For peer review only

1 | *Subject: bmjopen-2014-005033*.[RI](#): Autologous HSCT following HDCT for NRSTS

## 2 3 4 5 6 7 8 9 10 11 12 13 14 15 16 17 18 19 20 21 22 23 24 25 26 27 28 29 30 31 32 33 34 35 36 37 38 39 40 41 42 43 44 45 46 47 48 49 50 51 52 53 54 55 56 57 58 59 60

**Conclusion**

Overall survival in patients with locally advanced or metastatic NRSTS was not statistically different after autologous HSCT following HDCT compared to SDCT in a single RCT with a total of 83 patients. No other comparative study was available. A considerable number of patients were not evaluated concerning adverse events and its proportion among the transplanted patients remains unclear. If this treatment is offered it should only be after careful consideration and only within a randomised controlled trial.

1 | *Subject: [bmjopen-2014-005033.R1](#): Autologous HSCT following HDCT for NRSTS*

2  
3 Acknowledgments: We thank the Cochrane Gynaecological Cancer Review Group for their as-  
4  
5 sistance during the preparation of the Cochrane Review. The National Institute for Health Re-  
6  
7 search (NIHR) is the largest single funder of the Cochrane Gynaecological Cancer Group. The  
8  
9 views and opinions expressed therein are those of the authors and do not necessarily reflect those  
10  
11 of the NIHR, NHS or the Department of Health.  
12

13  
14  
15 Ethics statement: An ethics statement was not required for this work.  
16

17  
18 [Contributorship statement: FP created the search strategy, analysed the data and wrote the manu-](#)  
19  
20 [script. AML wrote the manuscript.](#)  
21

22  
23  
24 Competing Interests: No authors have any competing interests.  
25

26  
27 [Financial DisclosureFunding](#): Provision of fulltexts by the University of Cologne, Germany. No  
28  
29 funding bodies had any role in study design, data collection and analysis, decision to publish, or  
30  
31 preparation of the manuscript.  
32

33  
34 [Data sharing statement: No additional data available.](#)  
35  
36  
37  
38  
39  
40  
41  
42  
43  
44  
45  
46  
47  
48  
49  
50  
51  
52  
53  
54  
55  
56  
57  
58  
59  
60

1 | *Subject: bmjopen-2014-005033*.[.RI](#): Autologous HSCT following HDCT for NRSTS

## 2 | **References**

- 3 | 1. Weiss SW, Goldblum JR. *Enzinger and Weiss's soft tissue tumors*. St. Louis: Mosby, 2001.
- 4 | 2. Clark MA, Fisher C, Judson I, et al. Soft-tissue sarcomas in adults. *N Engl J Med*
- 5 | 2005;**353**(7):701-11
- 6 | 3. Sondak VK, Chang AE. Clinical evaluation and treatment of soft tissue tumors. In: Weiss SW,
- 7 | Goldblum JR, eds. *Enzinger and Weiss's soft tissue tumors*. St. Louis: Mosby, 2001:21-
- 8 | 44.
- 9 | 4. Fletcher CDM, Bridge JA, Hogendoorn PCW, et al. *WHO Classification of Tumours of Soft*
- 10 | *Tissue and Bone*. Fourth ed. Lyon: International Agency for Research on Cancer (IARC),
- 11 | 2013.
- 12 | 5. ESMO / European Sarcoma Network Working Group. Soft tissue and visceral sarcomas:
- 13 | ESMO Clinical Practice Guidelines for diagnosis, treatment and follow-up. *Ann Oncol*
- 14 | 2012;**23**(Suppl 7):vii92-0
- 15 | 6. Casali PG, Blay JY. Soft tissue sarcomas: ESMO Clinical Recommendations for diagnosis,
- 16 | treatment and follow-up. *Ann Oncol* 2010;**21**(Suppl 5):v198–v203
- 17 | 7. Kotilingam D, Lev DC, Lazar AJ, et al. Staging soft tissue sarcoma: evolution and change. *CA*
- 18 | *Cancer J Clin* 2006;**56**(5):282-91
- 19 | 8. Riedel RF. Systemic therapy for advanced soft tissue sarcomas: highlighting novel therapies
- 20 | and treatment approaches. *Cancer* 2012;**118**(6):1474-85 doi:
- 21 | 10.1002/cncr.26415[published Online First: Epub Date]].
- 22 | 9. Banna GL, Simonelli M, Santoro A. High-dose chemotherapy followed by autologous
- 23 | hematopoietic stem-cell transplantation for the treatment of solid tumors in adults: a
- 24 | critical review. *Curr Stem Cell Res Ther* 2007;**2**(1):65-82
- 25 | 10. Peinemann F, Smith LA, Bartel C. Autologous hematopoietic stem cell transplantation
- 26 | following high dose chemotherapy for non-rhabdomyosarcoma soft tissue sarcomas.
- 27 | *Cochrane Database Syst Rev* 2013;**8**:CD008216 doi:
- 28 | 10.1002/14651858.CD008216.pub4[published Online First: Epub Date]].
- 29 | 11. Cochrane. The Cochrane Policy Manual [updated 14 April 2011]. Oxford: The Cochrane
- 30 | Collaboration, 2011.
- 31 | 12. Moher D, Liberati A, Tetzlaff J, et al. Preferred reporting items for systematic reviews and
- 32 | meta-analyses: the PRISMA statement. *PLoS Med* 2009;**6**:e1000097-e97
- 33 | 13. Fletcher CDM, Unni KK, Mertens F. *Pathology and genetics of tumours of soft tissue and*
- 34 | *bone*. Lyon: IARC Press, 2002.
- 35 | 14. NCI. Common Terminology Criteria for Adverse Events (CTCAE) and Common Toxicity
- 36 | Criteria (CTC). Secondary Common Terminology Criteria for Adverse Events (CTCAE)
- 37 | and Common Toxicity Criteria (CTC) 2009.
- 38 | [http://ctep.cancer.gov/protocolDevelopment/electronic\\_applications/ctc.htm](http://ctep.cancer.gov/protocolDevelopment/electronic_applications/ctc.htm).



1 | *Subject: bmjopen-2014-005033*.[RI](#): Autologous HSCT following HDCT for NRSTS

- 2  
3 15. EndNote [program]. New York City: Thomson Reuters, 2013.  
4  
5 16. National Library of Medicine (NLM). *ClinicalTrials.gov*. Bethesda: National Institutes of  
6 Health (NIH), 2013.  
7  
8 17. International Clinical Trials Registry Platform (ICTRP). *ICTRP Search Platform*. Geneva:  
9 WHO World Health Organization, 2013.  
10  
11 18. NCI. *NCI dictionary of cancer terms*. Bethesda: National Cancer Institute, 2014.  
12  
13 19. Higgins JPT, Altman DG, Sterne JAC. Table 8.5.a The Cochrane Collaboration's tool for  
14 assessing risk of bias. Chapter 8: Assessing risk of bias in included studies. In: Higgins  
15 JPT GS, ed. *Cochrane Handbook for Systematic Reviews of Interventions Version 510*  
16 [updated March 2011] The Cochrane Collaboration, 2011 Available from [wwwcochrane-](http://www.cochrane-handbook.org)  
17 [handbookorg](http://www.cochrane-handbook.org). Chichester: John Wiley & Sons, Ltd, 2011.  
18  
19 20. Higgins JPT, Altman DG, Sterne JAC. Table 8.5.d Criteria for judging risk of bias in the  
20 'Risk of bias' assessment tool. Chapter 8: Assessing risk of bias in included studies. In:  
21 Higgins JPT GS, ed. *Cochrane Handbook for Systematic Reviews of Interventions*  
22 *Version 510* [updated March 2011] The Cochrane Collaboration Available from  
23 [wwwcochrane-](http://www.cochrane-handbook.org)  
24 [handbookorg](http://www.cochrane-handbook.org). Chichester: John Wiley & Sons, Ltd, 2011.  
25  
26 21. Bui-Nguyen B, Ray-Coquard I, Chevreau C, et al. High-dose chemotherapy consolidation for  
27 chemosensitive advanced soft tissue sarcoma patients: an open-label, randomized  
28 controlled trial. *Ann Oncol* 2012;**23**(3):777-84 doi: 10.1093/annonc/mdr282[published  
29 Online First: Epub Date]].  
30  
31 22. Bertuzzi A, Castagna L, Quagliuolo V, et al. Prospective study of high-dose chemotherapy  
32 and autologous peripheral stem cell transplantation in adult patients with advanced  
33 desmoplastic small round-cell tumour. *Br J Cancer* 2003;**89**(7):1159-61  
34  
35 23. Bisogno G, Ferrari A, Rosolen A, et al. Sequential intensified chemotherapy with stem cell  
36 rescue for children and adolescents with desmoplastic small round-cell tumor. *Bone*  
37 *Marrow Transplantation* 2010;**45**(5):907-11  
38  
39 24. Blay JY, Bouhour D, Ray-Coquard I, et al. High-dose chemotherapy with autologous  
40 hematopoietic stem-cell transplantation for advanced soft tissue sarcoma in adults.  
41 *Journal of Clinical Oncology* 2000;**18**(21):3643-50  
42  
43 25. Bokemeyer C, Franzke A, Hartmann JT, et al. A phase I/II study of sequential, dose-  
44 escalated, high dose ifosfamide plus doxorubicin with peripheral blood stem cell support  
45 for the treatment of patients with advanced soft tissue sarcomas. *Cancer*  
46 1997/10/1;**80**(7):1221-27  
47  
48 26. Cook RJ, Wang Z, Arora M, et al. Clinical outcomes of patients with desmoplastic small  
49 round cell tumor of the peritoneum undergoing autologous HCT: a CIBMTR  
50 retrospective analysis. *Bone Marrow Transplant* 2012;**47**(11):1455-8 doi:  
51 10.1038/bmt.2012.57[published Online First: Epub Date]].  
52  
53 27. Philippe-Chomette P, Kabbara N, Andre N, et al. Desmoplastic small round cell tumors with  
54 EWS-WT1 fusion transcript in children and young adults. *Pediatr Blood Cancer*  
55 2012;**58**(6):891-7 doi: 10.1002/pbc.23403[published Online First: Epub Date]].  
56  
57  
58  
59  
60

1 | *Subject: bmjopen-2014-005033*.[.RI](#): Autologous HSCT following HDCT for NRSTS

- 2  
3 28. Rosti G, Ferrante P, Ledermann J, et al. High-dose chemotherapy for solid tumors: results of  
4 the EBMT. *Crit Rev Oncol Hematol* 2002;**41**(2):129-40
- 5  
6 29. Neglia JP, Friedman DL, Yasui Y, et al. Second malignant neoplasms in five-year survivors  
7 of childhood cancer: childhood cancer survivor study. *J Natl Cancer Inst* 2001;**93**(8):618-  
8 29
- 9  
10 30. Baker KS, DeFor TE, Burns LJ, et al. New malignancies after blood or marrow stem-cell  
11 transplantation in children and adults: incidence and risk factors. *Journal of Clinical*  
12 *Oncology* 2003;**21**(7):1352-58
- 13  
14 31. Fletcher CD. The evolving classification of soft tissue tumours - an update based on the new  
15 2013 WHO classification. *Histopathology* 2014;**64**(1):2-11 doi:  
16 10.1111/his.12267[published Online First: Epub Date]].
- 17  
18 32. Doyle LA. Sarcoma classification: An update based on the 2013 World Health Organization  
19 Classification of Tumors of Soft Tissue and Bone. *Cancer* 2014;**120**(12):1763-74 doi:  
20 10.1002/cncr.28657[published Online First: Epub Date]].
- 21  
22 33. Fletcher CD. Pleomorphic malignant fibrous histiocytoma: fact or fiction? A critical  
23 reappraisal based on 159 tumors diagnosed as pleomorphic sarcoma. *Am J Surg Pathol*  
24 1992;**16**(3):213-28
- 25  
26 34. Matushansky I, Charytonowicz E, Mills J, et al. MFH classification: differentiating  
27 undifferentiated pleomorphic sarcoma in the 21st Century. *Expert Rev Anticancer Ther*  
28 2009;**9**(8):1135-44 doi: 10.1586/era.09.76[published Online First: Epub Date]].
- 29  
30 35. Fletcher CD, Gustafson P, Rydholm A, et al. Clinicopathologic re-evaluation of 100  
31 malignant fibrous histiocytomas: prognostic relevance of subclassification. *J Clin Oncol*  
32 2001;**19**(12):3045-50
- 33  
34 36. Kelleher FC, Viterbo A. Histologic and genetic advances in refining the diagnosis of  
35 "undifferentiated pleomorphic sarcoma". *Cancers* 2013;**5**(1):218-33 doi:  
36 10.3390/cancers5010218[published Online First: Epub Date]].
- 37  
38 37. ACS. *Sarcoma: Adult Soft Tissue Cancer*. Atlanta: American Cancer Society, 2013.
- 39  
40 38. Woods WG. Myeloablative therapy followed by stem cell rescue for pediatric solid tumors: a  
41 non-transplanter's perspective. *Cancer Research Therapy and Control* 1999;**9**(1-2):95-99
- 42  
43 39. Pedrazzoli P, Ledermann JA, Lotz JP, et al. High dose chemotherapy with autologous  
44 hematopoietic stem cell support for solid tumors other than breast cancer in adults. *Ann*  
45 *Oncol* 2006;**17**(10):1479-88
- 46  
47 40. Kasper B, Ho AD, Egerer G. Is there an indication for high-dose chemotherapy in the  
48 treatment of bone and soft-tissue sarcoma? *Oncology* 2005;**68**(2-3):115-21
- 49  
50 41. Doros L, Kaste SC, Rodriguez-Galindo C. Sister Mary Joseph's nodule as presenting sign of  
51 a desmoplastic small round cell tumor. *Pediatric Blood and Cancer* 2008(2):388-90
- 52  
53  
54  
55  
56  
57  
58  
59  
60

1 | *Subject: bmjopen-2014-005033*.[RI](#): Autologous HSCT following HDCT for NRSTS

- 2  
3 42. Engelhardt M, Zeiser R, Ihorst G, et al. High-dose chemotherapy and autologous peripheral  
4 blood stem cell transplantation in adult patients with high-risk or advanced Ewing and  
5 soft tissue sarcoma. *J Cancer Res Clin Oncol* 2007/1;**133**(1):1-11  
6  
7 43. Kasper B, Dietrich S, Mechtersheimer G, et al. Large institutional experience with dose-  
8 intensive chemotherapy and stem cell support in the management of sarcoma patients.  
9 *Oncology* 2007;**73**(1-2):58-64  
10  
11 44. Navid F, Santana VM, Billups CA, et al. Concomitant administration of vincristine,  
12 doxorubicin, cyclophosphamide, ifosfamide, and etoposide for high-risk sarcomas.  
13 *Cancer* 2006;**106**(8):1846-56  
14  
15 45. Saab R, Khoury JD, Krasin M, et al. Desmoplastic small round cell tumor in childhood: the  
16 St. Jude Children's Research Hospital experience. *Pediatr Blood Cancer* 2007(3):274-79  
17  
18 46. Slease RB, Benear JB, Selby GB, et al. High-dose combination alkylating agent therapy with  
19 autologous bone marrow rescue for refractory solid tumors. *J Clin Oncol* 1988;**6**(8):1314-  
20 20  
21  
22  
23  
24  
25  
26  
27  
28  
29  
30  
31  
32  
33  
34  
35  
36  
37  
38  
39  
40  
41  
42  
43  
44  
45  
46  
47  
48  
49  
50  
51  
52  
53  
54  
55  
56  
57  
58  
59  
60

Subject: *bmjopen-2014-005033*.[RI](#): Autologous HSCT following HDCT for NRSTS

## Figure legends

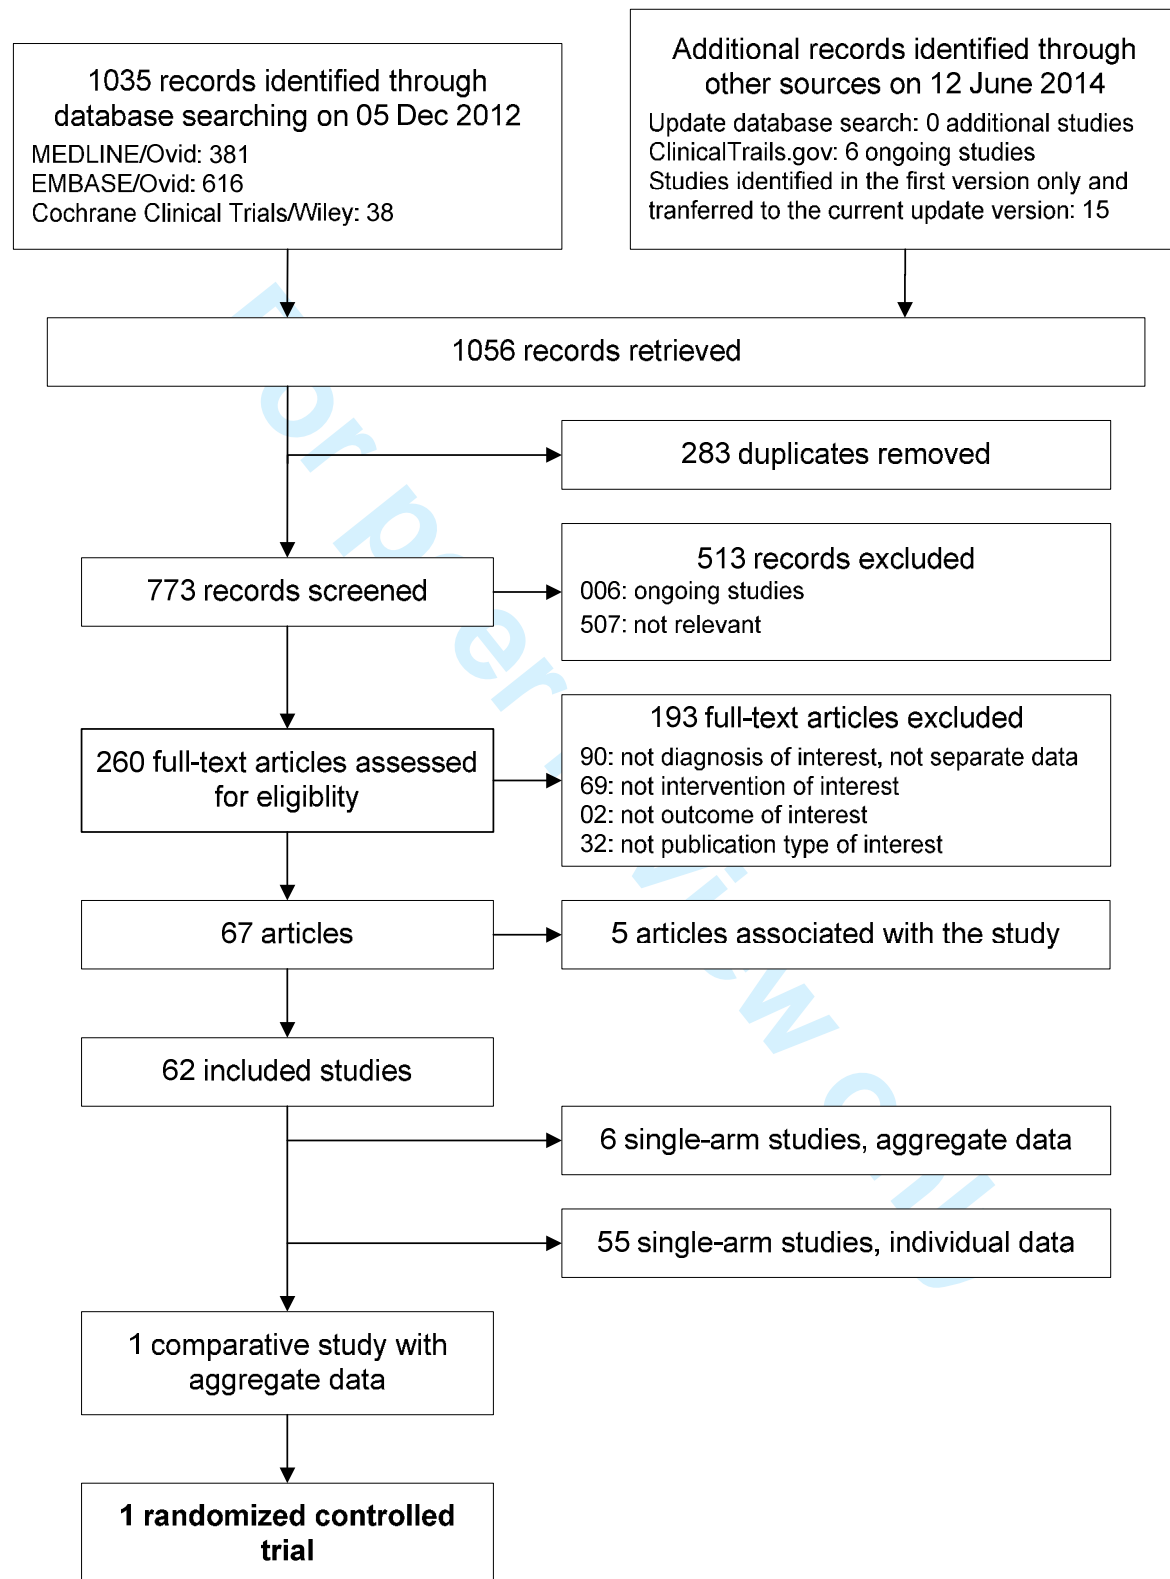

| Subject: *bmjopen-2014-005033*.[RI](#): Autologous HSCT following HDCT for NRSTS

**Figure 1. Literature search and study flow.**

For peer review only

1  
2  
3  
4  
5  
6  
7  
8  
9  
10  
11  
12  
13  
14  
15  
16  
17  
18  
19  
20  
21  
22  
23  
24  
25  
26  
27  
28  
29  
30  
31  
32  
33  
34  
35  
36  
37  
38  
39  
40  
41  
42  
43  
44  
45  
46  
47  
48  
49  
50  
51  
52  
53  
54  
55  
56  
57  
58  
59  
60

1  
2  
3  
4  
5  
6  
7  
8  
9  
10  
11  
12  
13  
14  
15  
16  
17  
18  
19  
20  
21  
22  
23  
24  
25  
26  
27  
28  
29  
30  
31  
32  
33  
34  
35  
36  
37  
38  
39  
40  
41  
42  
43  
44  
45  
46  
47  
48  
49

| Subject: *bmjopen-2014-005033*.[RI](#): Autologous HSCT following HDCT for NRSTS

## Tables

For peer review only

Subject: *bmjopen-2014-005033*.[R1](#): Autologous HSCT following HDCT for NRSTS

**Table 1. Inclusion of malignant soft tissue tumours of the WHO classification 2013 versus 2012**

| <u>Category</u>                             | <u>Malignant subtypes</u>                                            | <u>2013</u> | <u>2002</u> | <u>Inclusion</u> |
|---------------------------------------------|----------------------------------------------------------------------|-------------|-------------|------------------|
| <u>Adipocytic tumours</u>                   |                                                                      | <u>2013</u> | <u>2002</u> | <u>Included</u>  |
|                                             | <u>Dedifferentiated liposarcoma</u>                                  | <u>2013</u> | <u>2002</u> | <u>Included</u>  |
|                                             | <u>Myxoid liposarcoma</u>                                            | <u>2013</u> | <u>2002</u> | <u>Included</u>  |
|                                             | <u>Pleomorphic liposarcoma</u>                                       | <u>2013</u> | <u>2002</u> | <u>Included</u>  |
|                                             | <u>Liposarcoma, not otherwise specified</u>                          | <u>2013</u> | <u>2002</u> | <u>Included</u>  |
|                                             | <u>Round cell liposarcoma</u>                                        | <u>No</u>   | <u>2002</u> | <u>Included</u>  |
|                                             | <u>Mixed-type liposarcoma</u>                                        | <u>No</u>   | <u>2002</u> | <u>Included</u>  |
| <u>Fibroblastic/Myofibroblastic tumours</u> |                                                                      | <u>2013</u> | <u>2002</u> | <u>Included</u>  |
|                                             | <u>Adult fibrosarcoma</u>                                            | <u>2013</u> | <u>2002</u> | <u>Included</u>  |
|                                             | <u>Myxofibrosarcoma</u>                                              | <u>2013</u> | <u>2002</u> | <u>Included</u>  |
|                                             | <u>Low-grade fibromyxoid sarcoma</u>                                 | <u>2013</u> | <u>2002</u> | <u>Included</u>  |
|                                             | <u>Sclerosing epitheloid fibrosarcoma</u>                            | <u>2013</u> | <u>2002</u> | <u>Included</u>  |
|                                             | <u>Malignant haemangiopericytoma</u>                                 | <u>No</u>   | <u>No</u>   | <u>Included</u>  |
| <u>So-called fibrohistiocytic tumours</u>   |                                                                      | <u>2013</u> | <u>2002</u> | <u>Included</u>  |
|                                             | <u>Pleomorphic 'MFH'/ Undifferentiated pleomorphic sarcoma (UPS)</u> | <u>No</u>   | <u>2002</u> | <u>Included</u>  |
|                                             | <u>Giant cell 'MFH'/ UPS with giant cells</u>                        | <u>No</u>   | <u>2002</u> | <u>Included</u>  |
|                                             | <u>Inflammatory 'MFH'/ UPS with prominent inflammation</u>           | <u>No</u>   | <u>2002</u> | <u>Included</u>  |
| <u>Smooth muscle tumours</u>                |                                                                      | <u>2013</u> | <u>2002</u> | <u>Included</u>  |
|                                             | <u>Leiomyosarcoma (excluding skin)</u>                               | <u>2013</u> | <u>2002</u> | <u>Included</u>  |
| <u>Pericytic (perivascular) tumours</u>     |                                                                      | <u>2013</u> | <u>2002</u> | <u>No</u>        |
| <u>Skeletal muscle tumours</u>              |                                                                      | <u>2013</u> | <u>2002</u> | <u>No</u>        |
|                                             | <u>Embryonal rhabdomyosarcoma</u>                                    | <u>2013</u> | <u>2002</u> | <u>No</u>        |
|                                             | <u>Alveolar rhabdomyosarcoma</u>                                     | <u>2013</u> | <u>2002</u> | <u>No</u>        |
|                                             | <u>Pleomorphic rhabdomyosarcoma</u>                                  | <u>2013</u> | <u>2002</u> | <u>No</u>        |
|                                             | <u>Spindle cell/sclerosing rhabdomyosarcoma</u>                      | <u>2013</u> | <u>No</u>   | <u>No</u>        |
| <u>Vascular tumours of soft tissue</u>      |                                                                      | <u>2013</u> | <u>2002</u> | <u>Included</u>  |
|                                             | <u>Epithelioid haemangi endothelioma</u>                             | <u>2013</u> | <u>2002</u> | <u>Included</u>  |
|                                             | <u>Angiosarcoma of soft tissue</u>                                   | <u>2013</u> | <u>2002</u> | <u>Included</u>  |
| <u>Chondro-osseous tumours</u>              |                                                                      | <u>2013</u> | <u>2002</u> | <u>No</u>        |
|                                             | <u>Mesenchymal chondrosarcoma</u>                                    | <u>2013</u> | <u>2002</u> | <u>No</u>        |
|                                             | <u>Extraskeletal osteosarcoma</u>                                    | <u>2013</u> | <u>2002</u> | <u>No</u>        |

Subject: [bmjopen-2014-005033.R1](#): Autologous HSCT following HDCT for NRSTS

| <u>Category</u>                                | <u>Malignant subtypes</u>                                           | <u>2013</u> | <u>2002</u> | <u>Inclusion</u> |
|------------------------------------------------|---------------------------------------------------------------------|-------------|-------------|------------------|
| <u>Gastrointestinal stromal tumours</u>        |                                                                     | <u>2013</u> | <u>No</u>   | <u>Included</u>  |
|                                                | <u>Gastrointestinal stromal tumour, malignant</u>                   | <u>2013</u> | <u>No</u>   | <u>Included</u>  |
| <u>Nerve sheath tumors</u>                     |                                                                     | <u>2013</u> | <u>No</u>   | <u>Included</u>  |
|                                                | <u>Malignant peripheral nerve sheath tumour</u>                     | <u>2013</u> | <u>No</u>   | <u>Included</u>  |
|                                                | <u>Epithelioid malignangt peripheral nerve sheath tumour</u>        | <u>2013</u> | <u>No</u>   | <u>Included</u>  |
|                                                | <u>Malignant Triton tumour</u>                                      | <u>2013</u> | <u>No</u>   | <u>Included</u>  |
|                                                | <u>Malignant granular cell tumour</u>                               | <u>2013</u> | <u>No</u>   | <u>Included</u>  |
|                                                | <u>Ectomesenchymoma</u>                                             | <u>2013</u> | <u>No</u>   | <u>Included</u>  |
| <u>Tumours of uncertain differentiation</u>    |                                                                     | <u>2013</u> | <u>2002</u> | <u>Included</u>  |
|                                                | <u>Synovial sarcoma NOS</u>                                         | <u>2013</u> | <u>2002</u> | <u>Included</u>  |
|                                                | <u>Epithelioid sarcoma</u>                                          | <u>2013</u> | <u>2002</u> | <u>Included</u>  |
|                                                | <u>Alveolar soft-part sarcoma</u>                                   | <u>2013</u> | <u>2002</u> | <u>Included</u>  |
|                                                | <u>Clear cell sarcoma of soft tissue</u>                            | <u>2013</u> | <u>2002</u> | <u>Included</u>  |
|                                                | <u>Extraskeletal myxoid chondrosarcoma</u>                          | <u>2013</u> | <u>2002</u> | <u>No</u>        |
|                                                | <u>Extraskeletal Ewing sarcoma</u>                                  | <u>2013</u> | <u>2002</u> | <u>No</u>        |
|                                                | <u>Desmoplastic small round cell tumour</u>                         | <u>2013</u> | <u>2002</u> | <u>Included</u>  |
|                                                | <u>Extra-renal rhabdoid tumour</u>                                  | <u>2013</u> | <u>2002</u> | <u>Included</u>  |
|                                                | <u>Neoplasms with perivascular epithelioid cell differentiation</u> | <u>2013</u> | <u>2002</u> | <u>Included</u>  |
|                                                | <u>Intimal sarcoma</u>                                              | <u>2013</u> | <u>2002</u> | <u>Included</u>  |
|                                                | <u>Malignant Mesenchymoma</u>                                       | <u>No</u>   | <u>2002</u> | <u>Included</u>  |
| <u>Undifferentiated/ Unclassified sarcomas</u> |                                                                     | <u>2013</u> | <u>No</u>   | <u>Included</u>  |
|                                                | <u>Undifferentiated spindle cell sarcoma</u>                        | <u>2013</u> | <u>No</u>   | <u>Included</u>  |
|                                                | <u>Undifferentiated pleomorphic sarcoma</u>                         | <u>2013</u> | <u>No</u>   | <u>Included</u>  |
|                                                | <u>Undifferentiated round cell sarcoma</u>                          | <u>2013</u> | <u>No</u>   | <u>Included</u>  |
|                                                | <u>Undifferentiated epithelioid sarcoma</u>                         | <u>2013</u> | <u>No</u>   | <u>Included</u>  |
|                                                | <u>Undifferentiated sarcoma NOS</u>                                 | <u>2013</u> | <u>No</u>   | <u>Included</u>  |

Abbreviation. MFH: malignant fibrous histiocytoma; NOS: not otherwise specified; UPS: undifferentiated pleomorphic sarcoma



1  
2  
3  
4  
5  
6  
7  
8  
9  
10  
11  
12  
13  
14  
15  
16  
17  
18  
19  
20  
21  
22  
23  
24  
25  
26  
27  
28  
29  
30  
31  
32  
33  
34  
35  
36  
37  
38  
39  
40  
41  
42  
43  
44  
45  
46  
47  
48  
49

| Subject: *bmjopen-2014-005033*.[RI](#): Autologous HSCT following HDCT for NRSTS

**Table 2. Characteristics of studies and therapy**

| Study                             | N. centers (country) | Enrollment; years | Prospective design | Autologous HSCT following HDCT |                                     |                         |
|-----------------------------------|----------------------|-------------------|--------------------|--------------------------------|-------------------------------------|-------------------------|
|                                   |                      |                   |                    | Drugs                          | Consolidation vs. salvage vs. NR; N | PBSCT vs. BMT vs. NR; N |
| <b>Aggregate comparative data</b> |                      |                   |                    |                                |                                     |                         |
| Bui-Nguyen 2012 [21]              | 16 (France)          | 2000 to 2008      | Yes                | Ca-Et-If                       | 38 vs. 0 vs. 0                      | 38 vs. 0 vs. 0          |
| <b>Aggregate case series data</b> |                      |                   |                    |                                |                                     |                         |
| Bertuzzi 2003 [22]                | 1 (Italy)            | 1997 to 2002      | Yes                | Me-Mi-Th                       | 10 vs. 0 vs. 0                      | 10 vs. 0 vs. 0          |
| Bisogno 2010 [23]                 | >1 (Italy)           | 1999 to 2008      | Yes                | Cy-Me-Th                       | 14 vs. 0 vs. 0                      | 14 vs. 0 vs. 0          |
| Blay 2000 [24]                    | 1 (France)           | 1988 to 1994      | Yes                | Ci-Et-If                       | 0 vs. 0 vs. 24                      | 0 vs. 0 vs. 24          |
| Bokemeyer 1997 [25]               | 3 (Germany)          | NR                | No                 | Do-If                          | 16 vs. 0 vs. 0                      | 16 vs. 0 vs. 0          |
| Cook 2012 [26]                    | 29 (USA)             | 1999 to 2007      | No                 | Ca-Cy-Et-Me-Th                 | 0 vs. 0 vs. 36                      | 33 vs. 2 vs. 1          |
| Philippe-Chomette 2012 [27]       | >1 (France)          | 1995 to 2006      | No                 | Various                        | 14 vs. 0 vs. 0                      | 0 vs. 0 vs. 14          |
| <b>Individual cases data</b>      |                      |                   |                    |                                |                                     |                         |
| 55 studies (142 patients)         | Various              | Various           | No                 | Various                        | 69 vs. 61 vs. 12                    | 102 vs. 21 vs. 19       |

Abbreviations: BMT: bone marrow transplant; Ca: carboplatin; Ci: cisplatin; Cy: cyclophosphamide; Do: Doxorubicin; Et: etoposide = Vepesid = VP 16; HDCT: high-dose chemotherapy; HSCT: autologous haematopoietic stem cell transplantation; If: ifosfamide; Me: melphalan; Mi: mitoxantrone; N: number; NR: information not reported in the article; PBSCT: peripheral blood stem cell transplant; Th: thiotepa; vs.: versus

Subject: *bmjopen-2014-005033*.[RI](#): Autologous HSCT following HDCT for NRSTS

**Table 3. Characteristics of patients**

| Study                             | Patients analyzed; N |      | FU            | Subtypes | Age; median years (range) |               | Gender; % males |      |
|-----------------------------------|----------------------|------|---------------|----------|---------------------------|---------------|-----------------|------|
|                                   | HSCT                 | SDCT |               |          | HSCT                      | SDCT          | HSCT            | SDCT |
| <b>Aggregate comparative data</b> |                      |      |               |          |                           |               |                 |      |
| Bui-Nguyen 2012 [21]              | 38                   | 45   | 55 (NR)       | Various  | 46 (19 to 65)             | 43 (18 to 65) | 58              | 50   |
| <b>Aggregate case series data</b> |                      |      |               |          |                           |               |                 |      |
| Bertuzzi 2003 [22]                | 10                   | NA   | 35 (14 to 60) | DSRCT    | 29 (NR)                   | NA            | 100             | NA   |
| Bisogno 2010 [23]                 | 14                   | NA   | 27 (NR)       | DSRCT    | 10 (2 to 17)              | NA            | 93              | NA   |
| Blay 2000 [24]                    | 24                   | NA   | NR            | Various  | NR                        | NA            | NR              | NA   |
| Bokemeyer 1997 [25]               | 16                   | NA   | NR            | Various  | 45 (25 to 57)             | NA            | NR              | NA   |
| Cook 2012 [26]                    | 36                   | NA   | 44 (4 to 89)  | DSRCT    | 19 (8 to 46)              | NA            | 80              | NA   |
| Philippe-Chomette 2012 [27]       | 14                   | NA   | 23 (9 to 51)  | DSRCT    | NR (4 to 29)              | NA            | 86              | NA   |
| <b>Individual cases data</b>      |                      |      |               |          |                           |               |                 |      |
| 55 studies                        | 142                  | NA   | Various       | Various  | 25 (1 to 65)              | NA            | NR              | NA   |

Abbreviations: DSRCT: desmoplastic small-round cell tumor; FU: Follow-up of the analyzed patients in median months (range); HSCT: autologous haematopoietic stem cell transplantation following high-dose chemotherapy; N: number; NA: not applicable; NR: information not reported in the article; SDCT: standard-dose chemotherapy

| Subject: *bmjopen-2014-005033*.[RI](#): Autologous HSCT following HDCT for NRSTS

**Table 4. Frequency of subtypes**

| Subtype                                     | All | Aggregate | Individual |
|---------------------------------------------|-----|-----------|------------|
| Anaplastic sarcoma                          | 5   | 0         | 5          |
| Angiosarcoma                                | 10  | 4         | 6          |
| Clear cell sarcoma                          | 2   | 1         | 1          |
| Desmoplastic small round cell tumor         | 109 | 74        | 35         |
| Epitheloid sarcoma                          | 2   | 0         | 2          |
| Fibrosarcoma                                | 6   | 1         | 5          |
| Fibromyosarcoma                             | 1   | 0         | 1          |
| Leiomyosarcoma                              | 29  | 14        | 15         |
| Liposarcoma                                 | 15  | 8         | 7          |
| Mesenchymal sarcoma                         | 2   | 2         | 0          |
| Malignant fibrous histiocyoma               | 31  | 13        | 18         |
| Malignant haemangiopericytoma               | 8   | 5         | 3          |
| Malignant peripheral nerve sheath tumor     | 4   | 0         | 4          |
| Rhabdoid tumor, extra-renal, extra cerebral | 2   | 0         | 2          |
| Spindle cell sarcoma                        | 1   | 0         | 1          |
| Synovial sarcoma                            | 32  | 9         | 23         |
| Unclassified sarcoma                        | 17  | 12        | 5          |
| Undetermined sarcoma                        | 13  | 4         | 9          |
| Not NRSTS                                   | 5   | 5         | 0          |
| Total number                                | 294 | 152       | 142        |

Subject: *bmjopen-2014-005033*.[RI](#): Autologous HSCT following HDCT for NRSTS

**Table 5. Overall survival in studies reporting aggregate data**

| Study                             | Overall survival (95% CI), point estimates |                 |                 | Statistics                                 |
|-----------------------------------|--------------------------------------------|-----------------|-----------------|--------------------------------------------|
|                                   | HSCT at 2 years                            | HSCT at 3 years | SDCT at 3 years |                                            |
| <b>Aggregate comparative data</b> |                                            |                 |                 |                                            |
| Bui-Nguyen 2012 [21]              |                                            | 32.7%           | 49.4%           | Hazard ratio 1.26 (0.70 to 2.29), P = 0.44 |
| <b>Aggregate case series data</b> |                                            |                 |                 |                                            |
| Bertuzzi 2003 [22]                | 20%                                        | NR              | NA              |                                            |
| Bisogno 2010 [23]                 | 48%                                        | 38.9%           | NA              |                                            |
| Blay 2000 [24]                    | NR                                         | NR              | NA              |                                            |
| Bokemeyer 1997 [25]               | Median 13 months, range 3 to 19            |                 | NA              |                                            |
| Cook 2012 [26]                    | NR                                         | 40% (24 to 58)  | NA              |                                            |
| Philippe-Chomette 2012 [27]       | 51.4% (23.2 to 79.6)                       | NR              | NA              |                                            |

Some estimates were deduced from Kaplan-Meier plots.

Abbreviation. CI: confidence interval; HSCT: autologous haematopoietic stem cell transplantation following high-dose chemotherapy; NA: not applicable; NR: not reported; P: p-value; SDCT: standard-dose chemotherapy

1  
2  
3  
4  
5  
6  
7  
8  
9  
10  
11  
12  
13  
14  
15  
16  
17  
18  
19  
20  
21  
22  
23  
24  
25  
26  
27  
28  
29  
30  
31  
32  
33  
34  
35  
36  
37  
38  
39  
40  
41  
42  
43  
44  
45  
46  
47  
48  
49

| Subject: *bmjopen-2014-005033*.[RI](#): Autologous HSCT following HDCT for NRSTS

**Table 6. Treatment-related mortality in the HSCT arm of all included studies**

| Study                              | N affected / N evaluated patients | Specification                                                       |
|------------------------------------|-----------------------------------|---------------------------------------------------------------------|
| <b>Treatment-related mortality</b> |                                   |                                                                     |
| Bui-Nguyen 2012 [21]               | 1 / 38                            | Treatment-related leukemia death 2 years after HSCT                 |
| Cook 2012 [26]                     | 2 / 36                            | NR                                                                  |
| Doros 2008 [41]                    | 1 / 1                             | NR                                                                  |
| Engelhardt 2007 [42]               | 3 / 24                            | Sepsis (N = 2); pneumonia related to lung metastases (N = 1)        |
| Kasper 2007 [43]                   | 1 / 14                            | Cardiac arrest of unknown cause                                     |
| Matsuzaki 2002                     | 1 / 1                             | Multiple organ failure                                              |
| Navid 2006 [44]                    | 1 / 2                             | Liver as well as kidney failure                                     |
| Philippe-Chomette 2012 [27]        | 1 / 14                            | Died of treatment toxicity 12 months after HSCT                     |
| Saab 2007 [45]                     | 2 / 4                             | Acute myocardial infarction (N = 1); veno-occlusive disease (N = 1) |
| Sleasne 1988 [46]                  | 2 / 3                             | Progressive encephalopathy (N = 1); sepsis (N = 1)                  |
| Total                              | 15 / 137                          |                                                                     |

Abbreviation. HSCT: autologous haematopoietic stem cell transplantation following high-dose chemotherapy; N: number; NR: not reported

1  
2  
3 | Subject: *bmjopen-2014-005033*.[RI](#): Autologous HSCT following HDCT for NRSTS  
4

5 **Table 7. Grade 3 to 4 NCI-CTCAE non-haematological toxicity in the HSCT arm of studies reporting aggregate case series data**  
6

| Study                             | N events / N evaluated patients | Specification                                                                                                  |
|-----------------------------------|---------------------------------|----------------------------------------------------------------------------------------------------------------|
| <b>Aggregate comparative data</b> |                                 |                                                                                                                |
| Bui-Nguyen 2012 [21]              | 11 / 38                         | Digestive (N = 8); infection (N = 2); pain (N = 1)                                                             |
| <b>Aggregate case series data</b> |                                 |                                                                                                                |
| Bertuzzi 2003 [22]                | NR                              | NA                                                                                                             |
| Bisogno 2010 [23]                 | 1 / 14                          | Mucositis grade 4                                                                                              |
| Blay 2000 [24]                    | 16 / 24                         | Neurologic grade 4 (N = 1); lung grade 3/4 (N = 2); renal grade 3/4 (N = 5); nausea/vomiting grade 3/4 (N = 8) |
| Bokemeyer 1997 [25]               | 8 / 16                          | No grade 4; neurologic (N = 1); renal (N = 2); infection (N = 1); mucositis (N = 2); nausea/emesis (N = 2)     |
| Cook 2012 [26]                    | NR                              | NA                                                                                                             |
| Philippe-Chomette 2012 [27]       | NR                              | NA                                                                                                             |

18 Abbreviation. HSCT: autologous haematopoietic stem cell transplantation following high-dose chemotherapy; N: number; NA: not applicable; NR:  
19 not reported; NCI-CTCAE: National Cancer Institute (NCI) Common Terminology Criteria for Adverse Events (CTCAE) grade III to IV[14]  
20  
21  
22  
23  
24  
25  
26  
27  
28  
29  
30  
31  
32  
33  
34  
35  
36  
37  
38  
39  
40  
41  
42

1  
2  
3  
4  
5  
6  
7  
8  
9  
10  
11  
12  
13  
14  
15  
16  
17  
18  
19  
20  
21  
22  
23  
24  
25  
26  
27  
28  
29  
30  
31  
32  
33  
34  
35  
36  
37  
38  
39  
40  
41  
42  
43  
44  
45  
46  
47  
48  
49  
50  
51  
52  
53  
54  
55  
56  
57  
58  
59  
60

| *Subject: bmjopen-2014-005033*.[RI](#): Autologous HSCT following HDCT for NRSTS

For peer review only

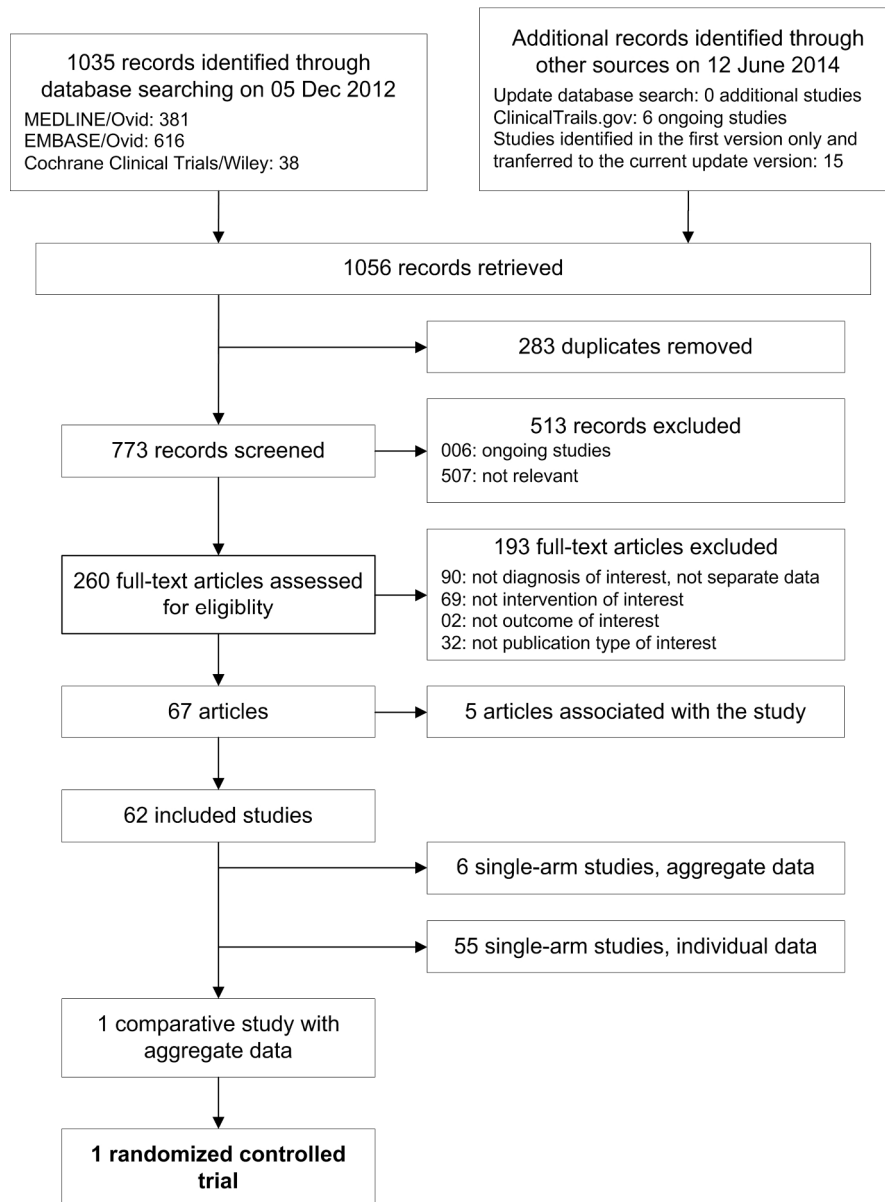

170x230mm (300 x 300 DPI)





# PRISMA 2009 Checklist

| Section/topic                      | #  | Checklist item                                                                                                                                                                                                                                                                                              | Reported on page #     |
|------------------------------------|----|-------------------------------------------------------------------------------------------------------------------------------------------------------------------------------------------------------------------------------------------------------------------------------------------------------------|------------------------|
| <b>TITLE</b>                       |    |                                                                                                                                                                                                                                                                                                             |                        |
| Title                              | 1  | Identify the report as a systematic review, meta-analysis, or both.                                                                                                                                                                                                                                         | 1                      |
| <b>ABSTRACT</b>                    |    |                                                                                                                                                                                                                                                                                                             |                        |
| Structured summary                 | 2  | Provide a structured summary including, as applicable: background; objectives; data sources; study eligibility criteria, participants, and interventions; study appraisal and synthesis methods; results; limitations; conclusions and implications of key findings; systematic review registration number. | 2 to 3                 |
| <b>INTRODUCTION</b>                |    |                                                                                                                                                                                                                                                                                                             |                        |
| Rationale                          | 3  | Describe the rationale for the review in the context of what is already known.                                                                                                                                                                                                                              | 4                      |
| Objectives                         | 4  | Provide an explicit statement of questions being addressed with reference to participants, interventions, comparisons, outcomes, and study design (PICOS).                                                                                                                                                  | 4                      |
| <b>METHODS</b>                     |    |                                                                                                                                                                                                                                                                                                             |                        |
| Protocol and registration          | 5  | Indicate if a review protocol exists, if and where it can be accessed (e.g., Web address), and, if available, provide registration information including registration number.                                                                                                                               | not applicable         |
| Eligibility criteria               | 6  | Specify study characteristics (e.g., PICOS, length of follow-up) and report characteristics (e.g., years considered, language, publication status) used as criteria for eligibility, giving rationale.                                                                                                      | 5                      |
| Information sources                | 7  | Describe all information sources (e.g., databases with dates of coverage, contact with study authors to identify additional studies) in the search and date last searched.                                                                                                                                  | 5 to 6                 |
| Search                             | 8  | Present full electronic search strategy for at least one database, including any limits used, such that it could be repeated.                                                                                                                                                                               | in the Cochrane review |
| Study selection                    | 9  | State the process for selecting studies (i.e., screening, eligibility, included in systematic review, and, if applicable, included in the meta-analysis).                                                                                                                                                   | 5 to 6                 |
| Data collection process            | 10 | Describe method of data extraction from reports (e.g., piloted forms, independently, in duplicate) and any processes for obtaining and confirming data from investigators.                                                                                                                                  | 5 to 6                 |
| Data items                         | 11 | List and define all variables for which data were sought (e.g., PICOS, funding sources) and any assumptions and simplifications made.                                                                                                                                                                       | 5 to 6                 |
| Risk of bias in individual studies | 12 | Describe methods used for assessing risk of bias of individual studies (including specification of whether this was done at the study or outcome level), and how this information is to be used in any data synthesis.                                                                                      | 6                      |
| Summary measures                   | 13 | State the principal summary measures (e.g., risk ratio, difference in means).                                                                                                                                                                                                                               | 6                      |

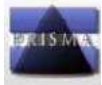

# PRISMA 2009 Checklist

|                      |    |                                                                                                                                                           |   |
|----------------------|----|-----------------------------------------------------------------------------------------------------------------------------------------------------------|---|
| Synthesis of results | 14 | Describe the methods of handling data and combining results of studies, if done, including measures of consistency (e.g., $I^2$ ) for each meta-analysis. | 6 |
|----------------------|----|-----------------------------------------------------------------------------------------------------------------------------------------------------------|---|

Page 1 of 2

| Section/topic                 | #  | Checklist item                                                                                                                                                                                           | Reported on page #     |
|-------------------------------|----|----------------------------------------------------------------------------------------------------------------------------------------------------------------------------------------------------------|------------------------|
| Risk of bias across studies   | 15 | Specify any assessment of risk of bias that may affect the cumulative evidence (e.g., publication bias, selective reporting within studies).                                                             | 6                      |
| Additional analyses           | 16 | Describe methods of additional analyses (e.g., sensitivity or subgroup analyses, meta-regression), if done, indicating which were pre-specified.                                                         | 6                      |
| <b>RESULTS</b>                |    |                                                                                                                                                                                                          |                        |
| Study selection               | 17 | Give numbers of studies screened, assessed for eligibility, and included in the review, with reasons for exclusions at each stage, ideally with a flow diagram.                                          | figure 1               |
| Study characteristics         | 18 | For each study, present characteristics for which data were extracted (e.g., study size, PICOS, follow-up period) and provide the citations.                                                             | 7, table 1             |
| Risk of bias within studies   | 19 | Present data on risk of bias of each study and, if available, any outcome level assessment (see item 12).                                                                                                | in the Cochrane review |
| Results of individual studies | 20 | For all outcomes considered (benefits or harms), present, for each study: (a) simple summary data for each intervention group (b) effect estimates and confidence intervals, ideally with a forest plot. | 8, table 2 to 3        |
| Synthesis of results          | 21 | Present results of each meta-analysis done, including confidence intervals and measures of consistency.                                                                                                  | table 2, figure 2      |
| Risk of bias across studies   | 22 | Present results of any assessment of risk of bias across studies (see Item 15).                                                                                                                          | in the Cochrane review |
| Additional analysis           | 23 | Give results of additional analyses, if done (e.g., sensitivity or subgroup analyses, meta-regression [see Item 16]).                                                                                    | none                   |
| <b>DISCUSSION</b>             |    |                                                                                                                                                                                                          |                        |
| Summary of evidence           | 24 | Summarize the main findings including the strength of evidence for each main outcome; consider their relevance to key groups (e.g., healthcare providers, users, and policy makers).                     | 10                     |
| Limitations                   | 25 | Discuss limitations at study and outcome level (e.g., risk of bias), and at review-level (e.g., incomplete retrieval of identified research, reporting bias).                                            | 10 to 11               |
| Conclusions                   | 26 | Provide a general interpretation of the results in the context of other evidence, and implications for future research.                                                                                  | 12                     |

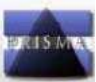

# PRISMA 2009 Checklist

1  
2  
3  
4  
5  
6  
7  
8  
9  
10  
11  
12  
13  
14  
15  
16  
17  
18  
19  
20  
21  
22  
23  
24  
25  
26  
27  
28  
29  
30  
31  
32  
33  
34  
35  
36  
37  
38  
39  
40  
41  
42  
43  
44  
45  
46  
47  
48  
49

| FUNDING |    |                                                                                                                                            |    |
|---------|----|--------------------------------------------------------------------------------------------------------------------------------------------|----|
| Funding | 27 | Describe sources of funding for the systematic review and other support (e.g., supply of data); role of funders for the systematic review. | 13 |

From: Moher D, Liberati A, Tetzlaff J, Altman DG, The PRISMA Group (2009). Preferred Reporting Items for Systematic Reviews and Meta-Analyses: The PRISMA Statement. PLoS Med 6(6): e1000097. doi:10.1371/journal.pmed1000097

For more information, visit: [www.prisma-statement.org](http://www.prisma-statement.org).

Page 2 of 2

For peer review only
